# Supplementary material
Source: PubMed Central journal article supplement (PMC5584685)
Supplement: NIHMS878372-supplement-Supplemental_information___Supplemental_figures.pdf [file NIHMS878372-supplement-Supplemental_information___Supplemental_figures.pdf]

Supplementary Figure 1 - The cloning and sequencing strategy of the experiments.

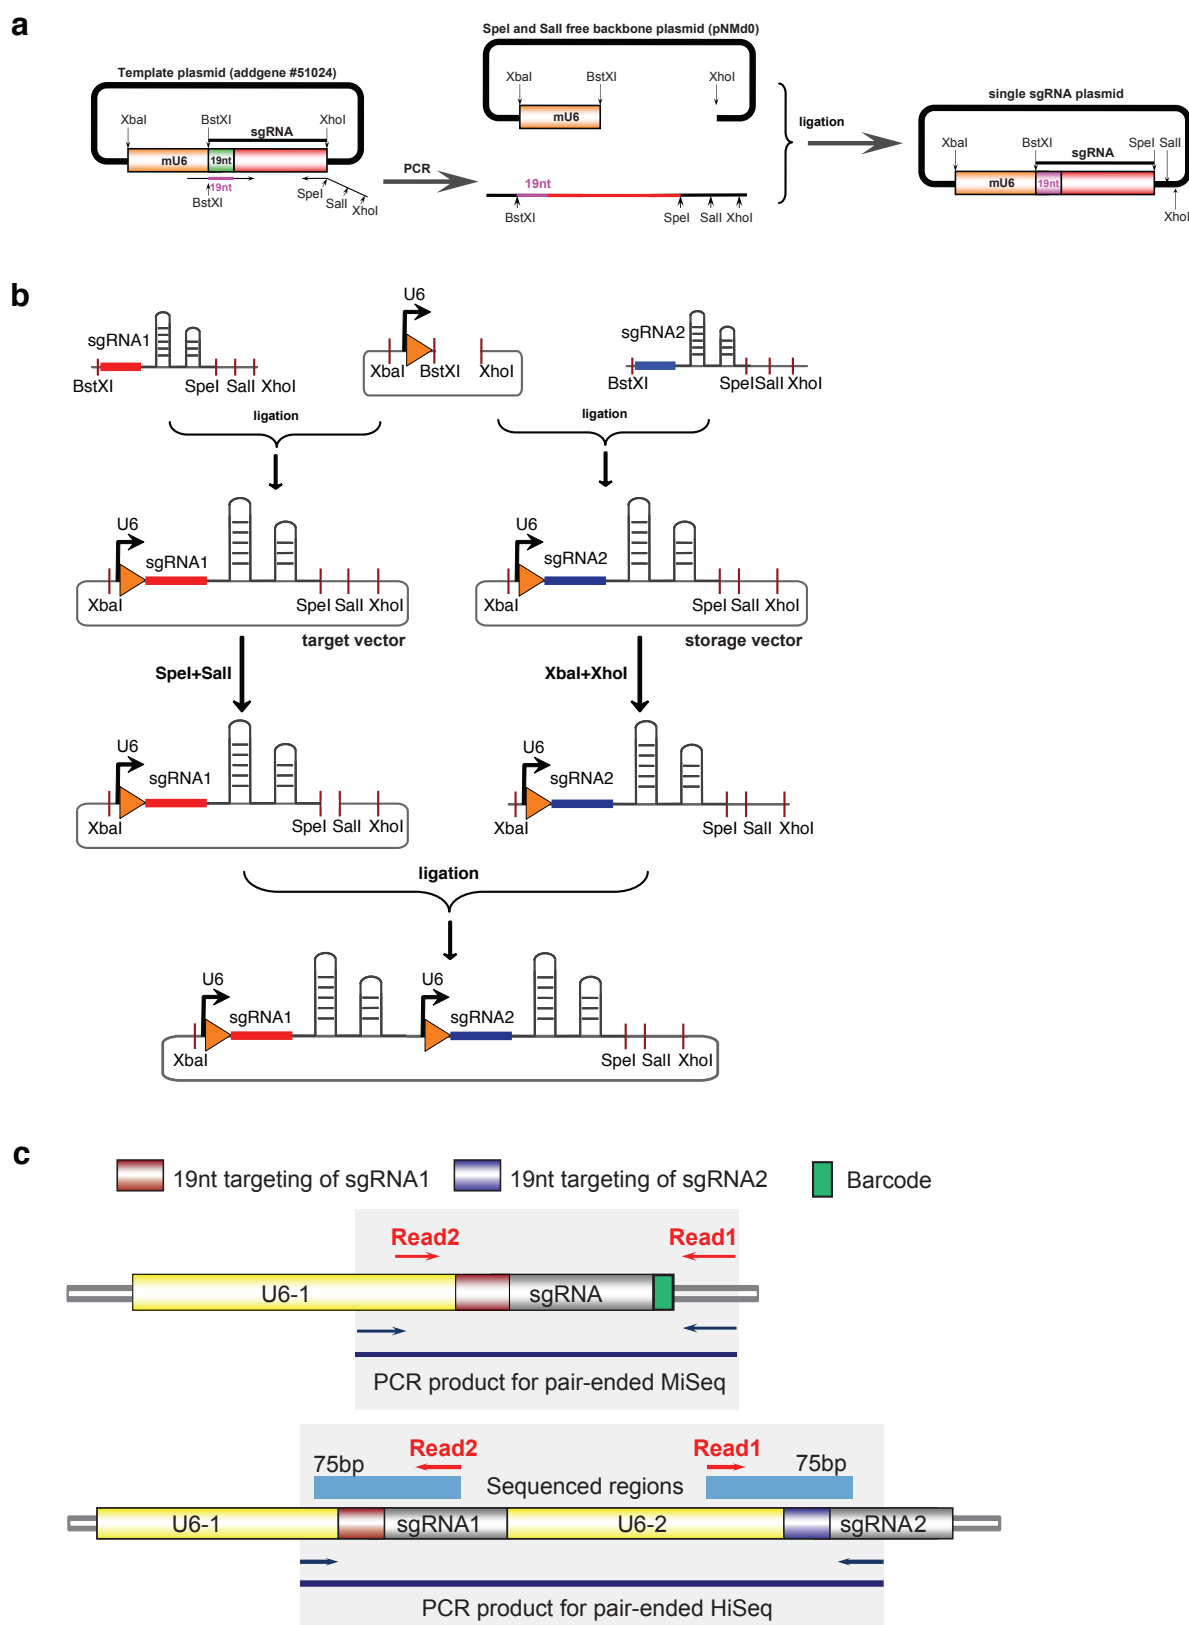

Figure S1 | The cloning and sequencing strategy of the experiments.

(a) Construction of the sgRNAs by introducing additional restriction enzyme sites (SpeI and Sall). (b) Cloning strategy for generating the double sgRNA library. Two pairs of compatible restriction enzyme sites are used here: SpeI + XbaI, and XhoI + Sall. The strategy can allow insertion of more sgRNAs sequentially onto the vector. (c) Sequencing strategy to analyze the sgRNA sequences for the single sgRNA library (top) and the double sgRNA library (bottom).

a (page 1 of 9)

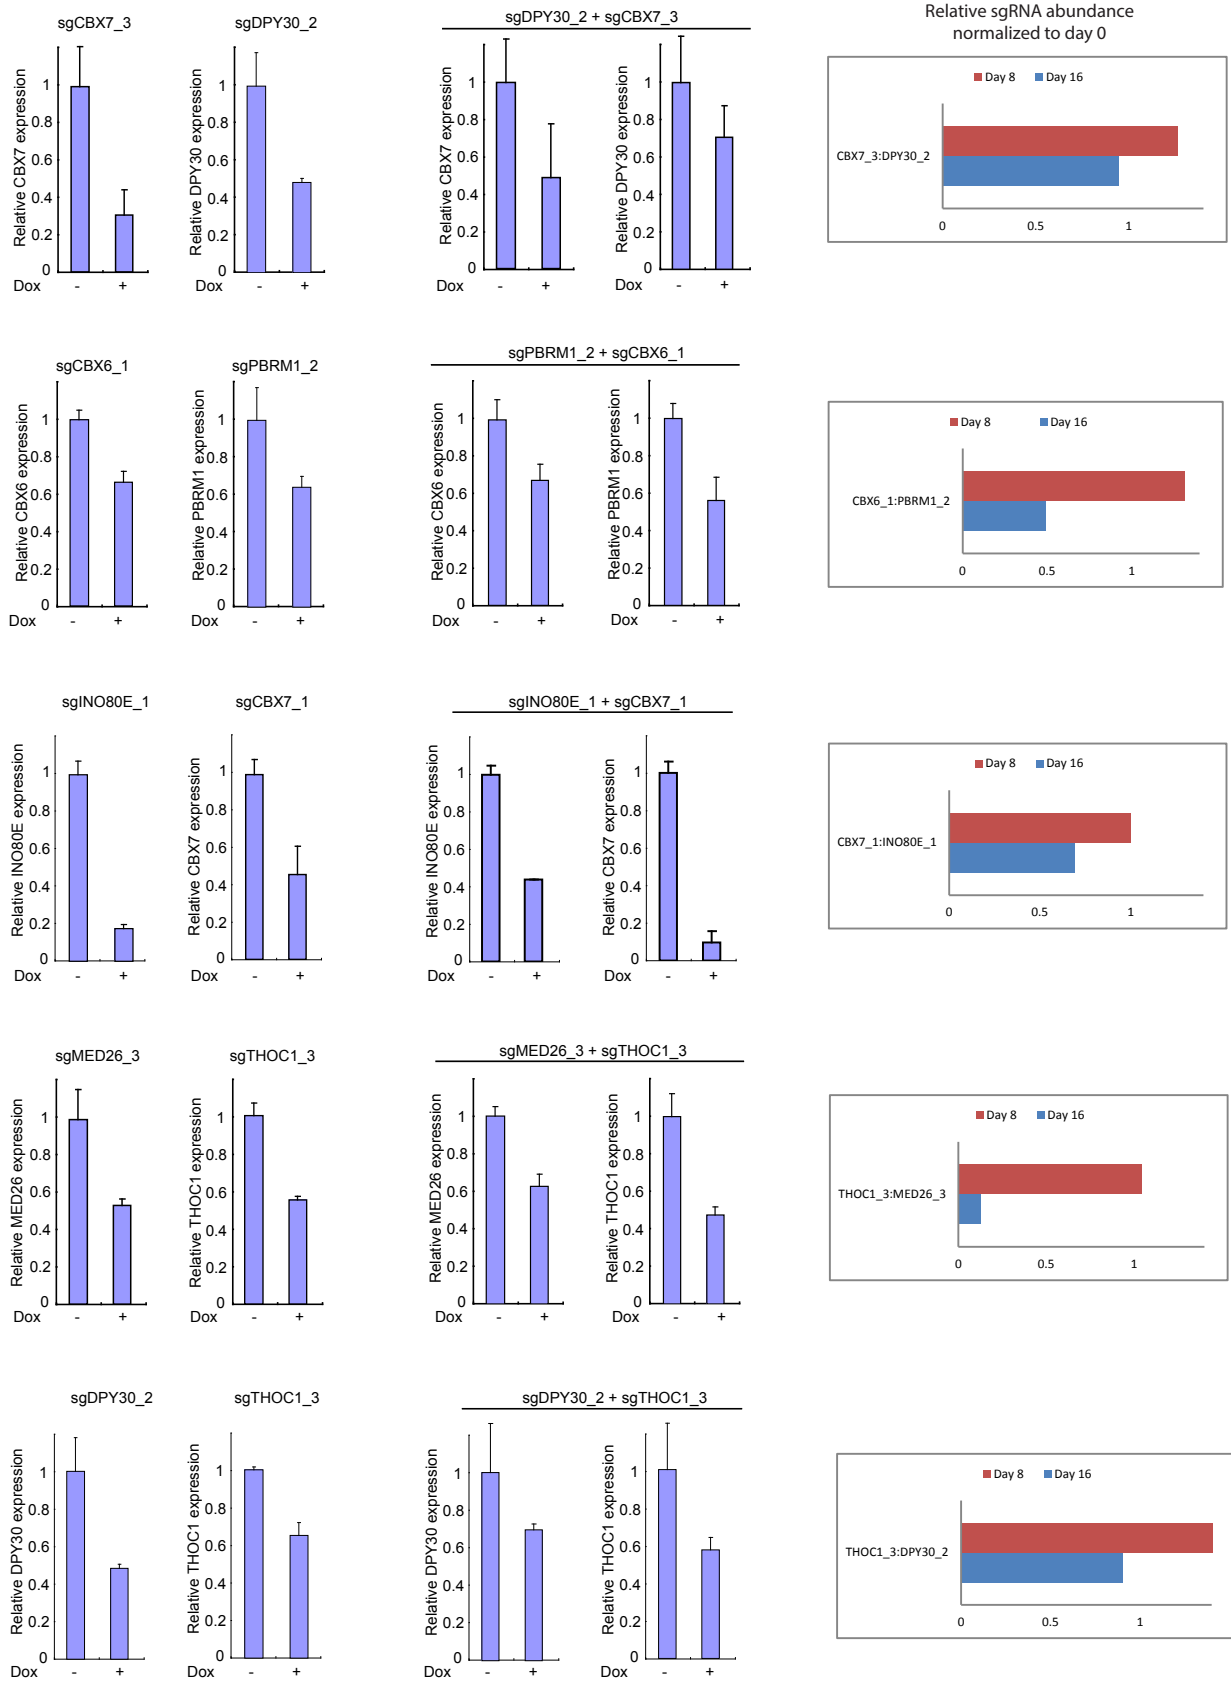

Figure S2 | Gene repression efficiencies of single and double sgRNA constructs.

(a) Quantitative PCR measurement of transcriptional repression efficiency for a set of single (28) and double (42) sgRNA constructs. Each row represents a pair of sgRNAs introduced into cells individually or as a pair. Error bars indicate standard deviation. Horizontal bar charts represent growth phenotypes as observed in the pooled growth competition assay (similar to Figure S5f).

Supplementary Figure 2 - Gene repression efficiencies of single and double sgRNA constructs. page 2 of 11

a (page 2 of 9)

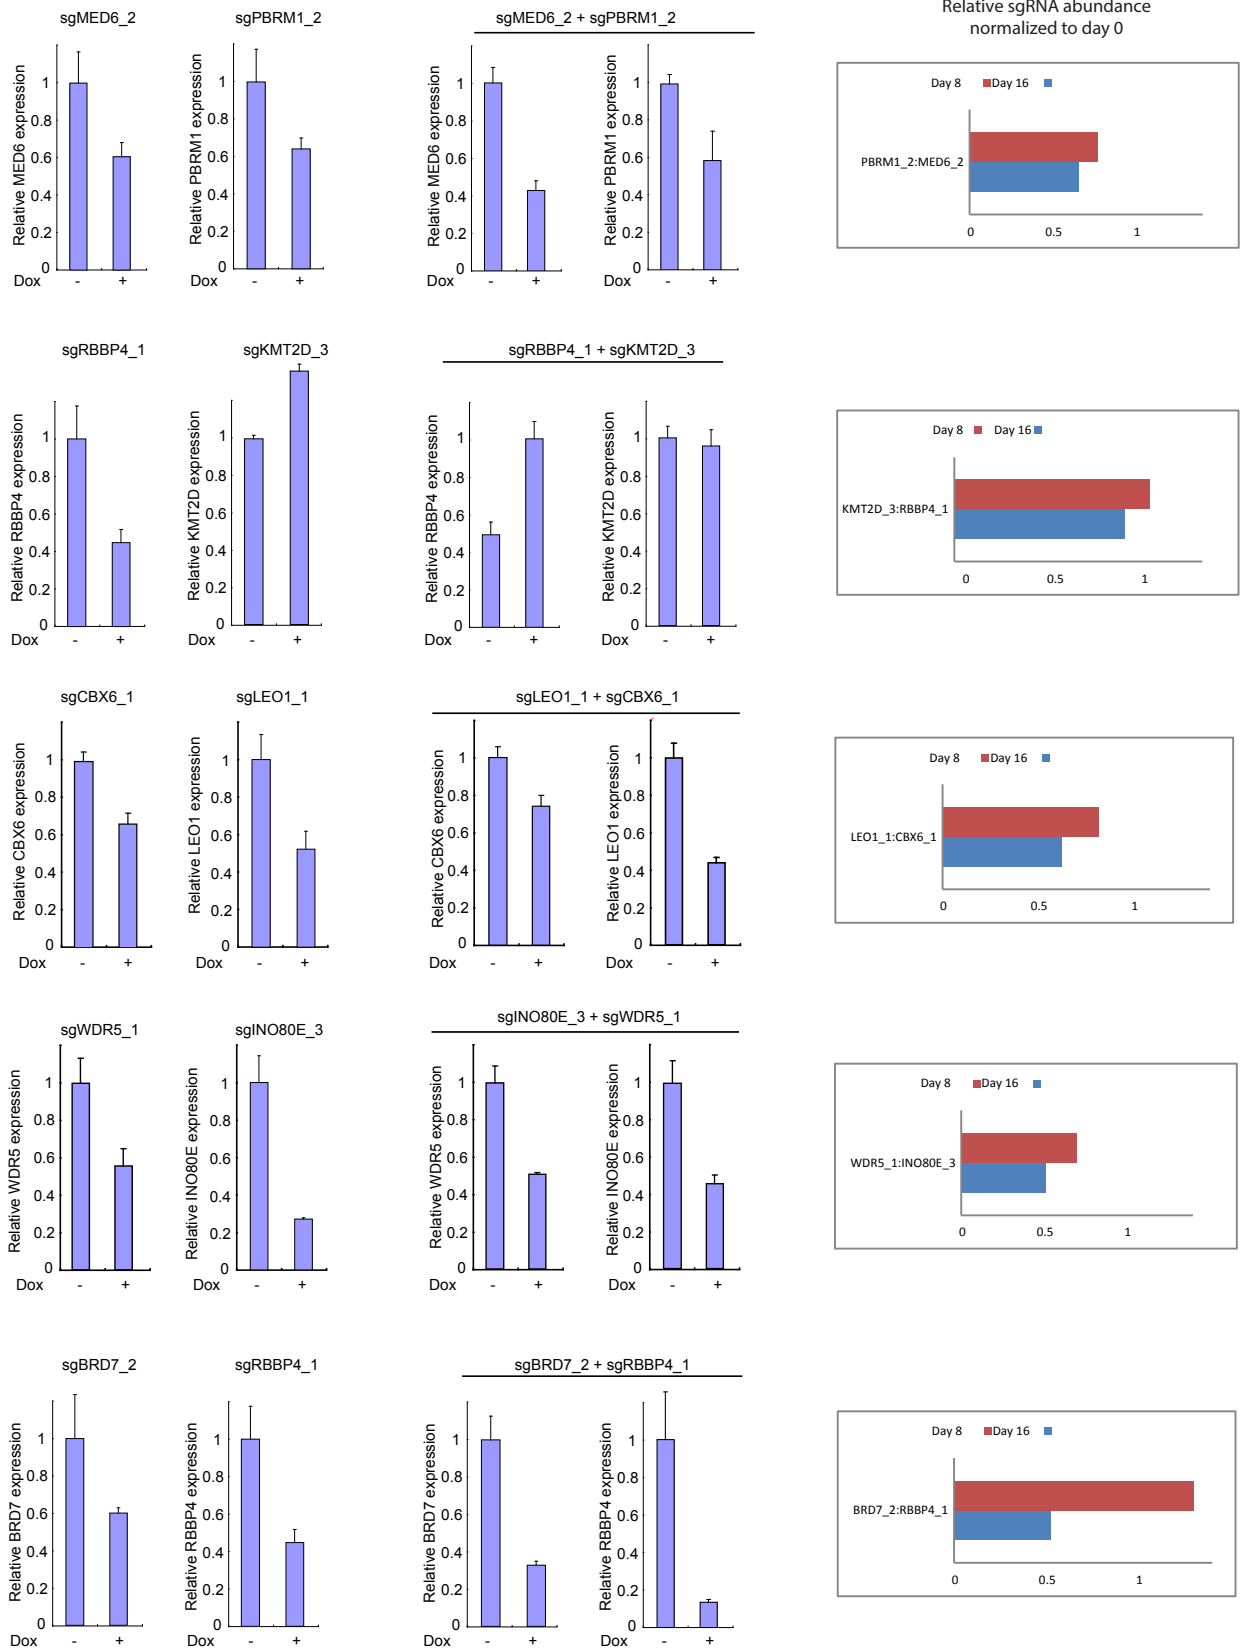

a (page 3 of 9)

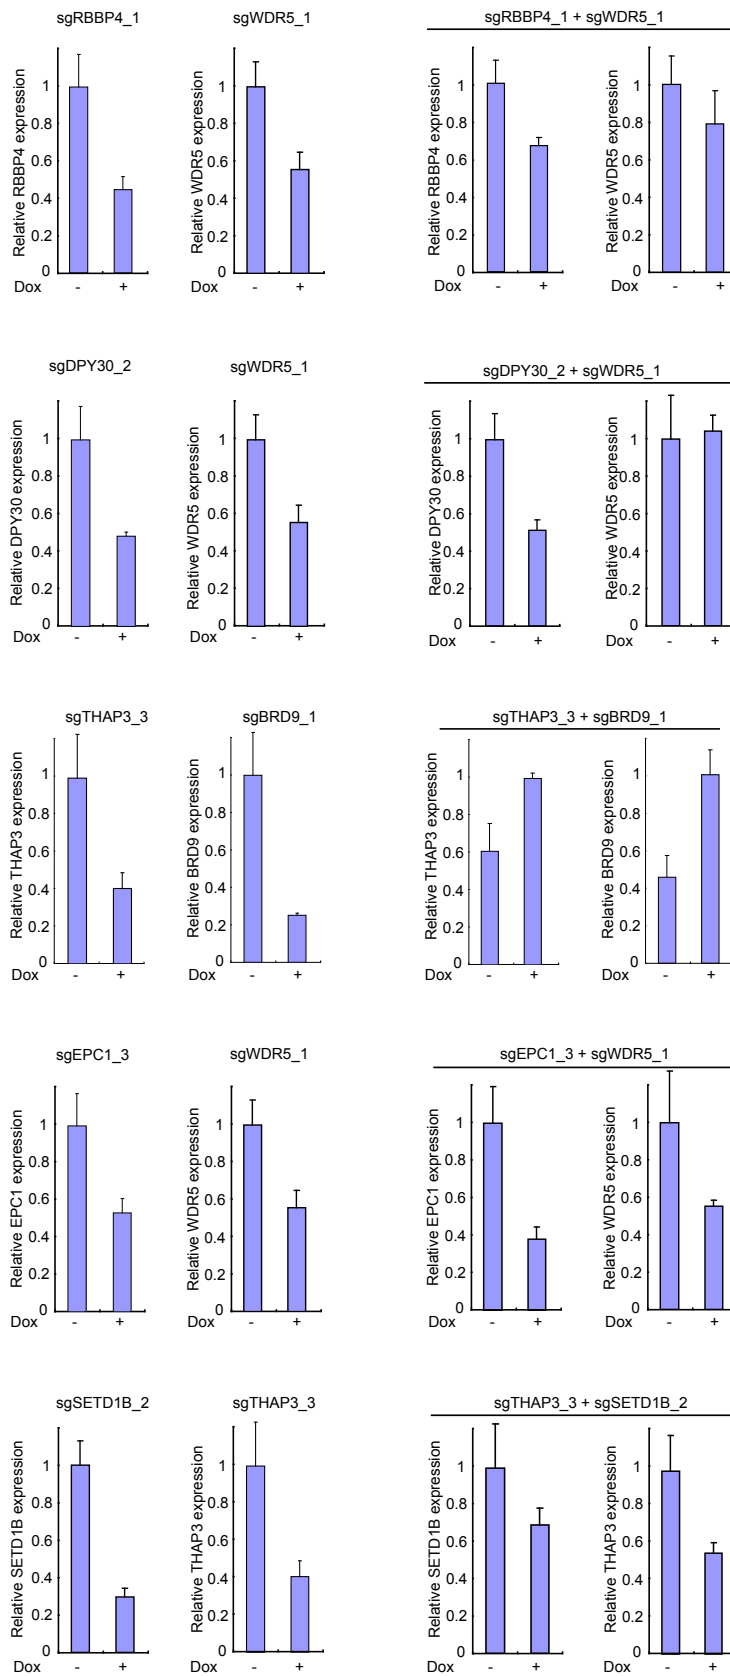



a (page 4 of 9)

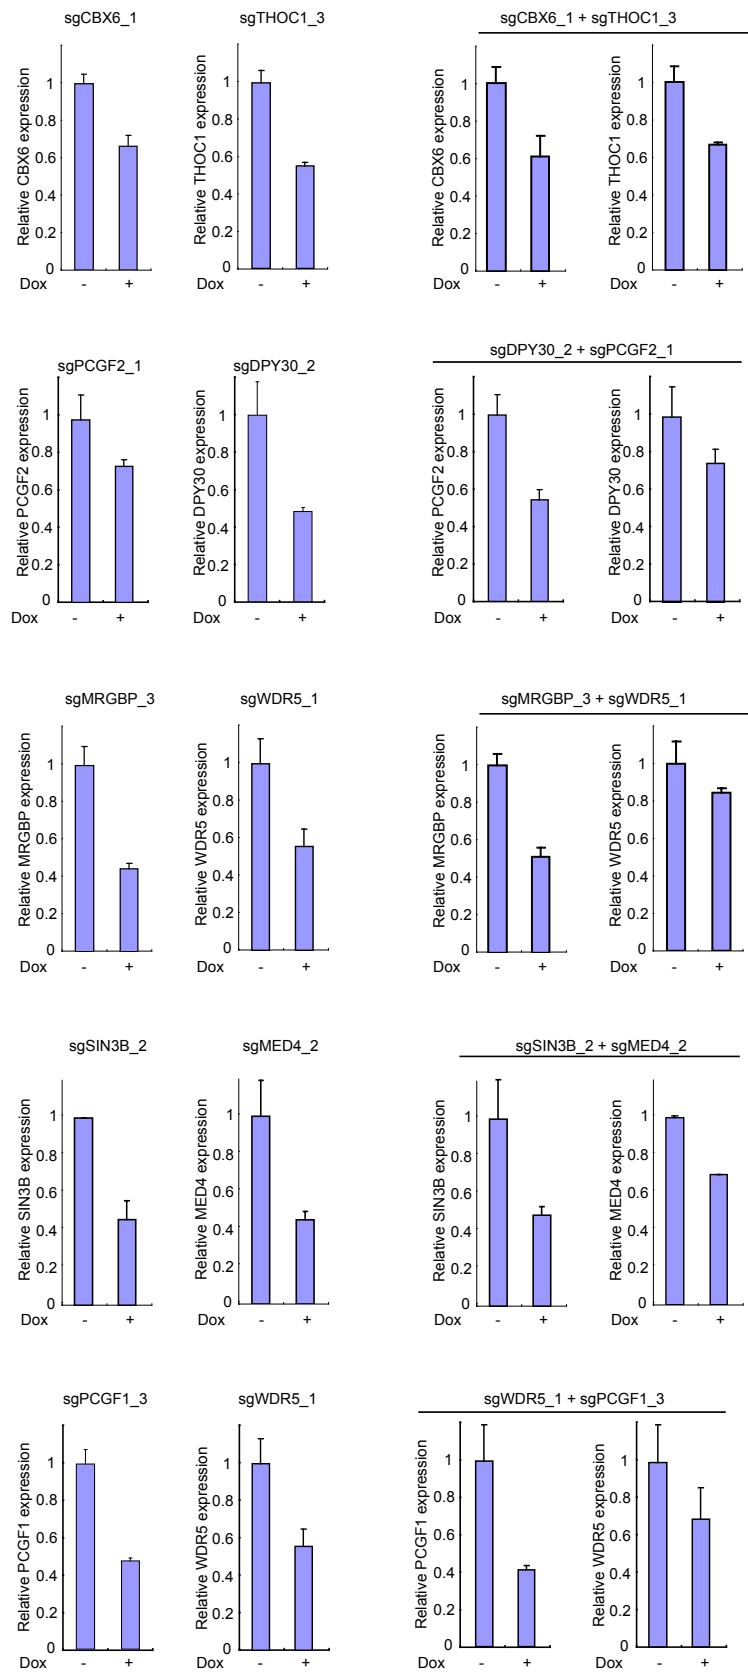

a (page 5 of 9)

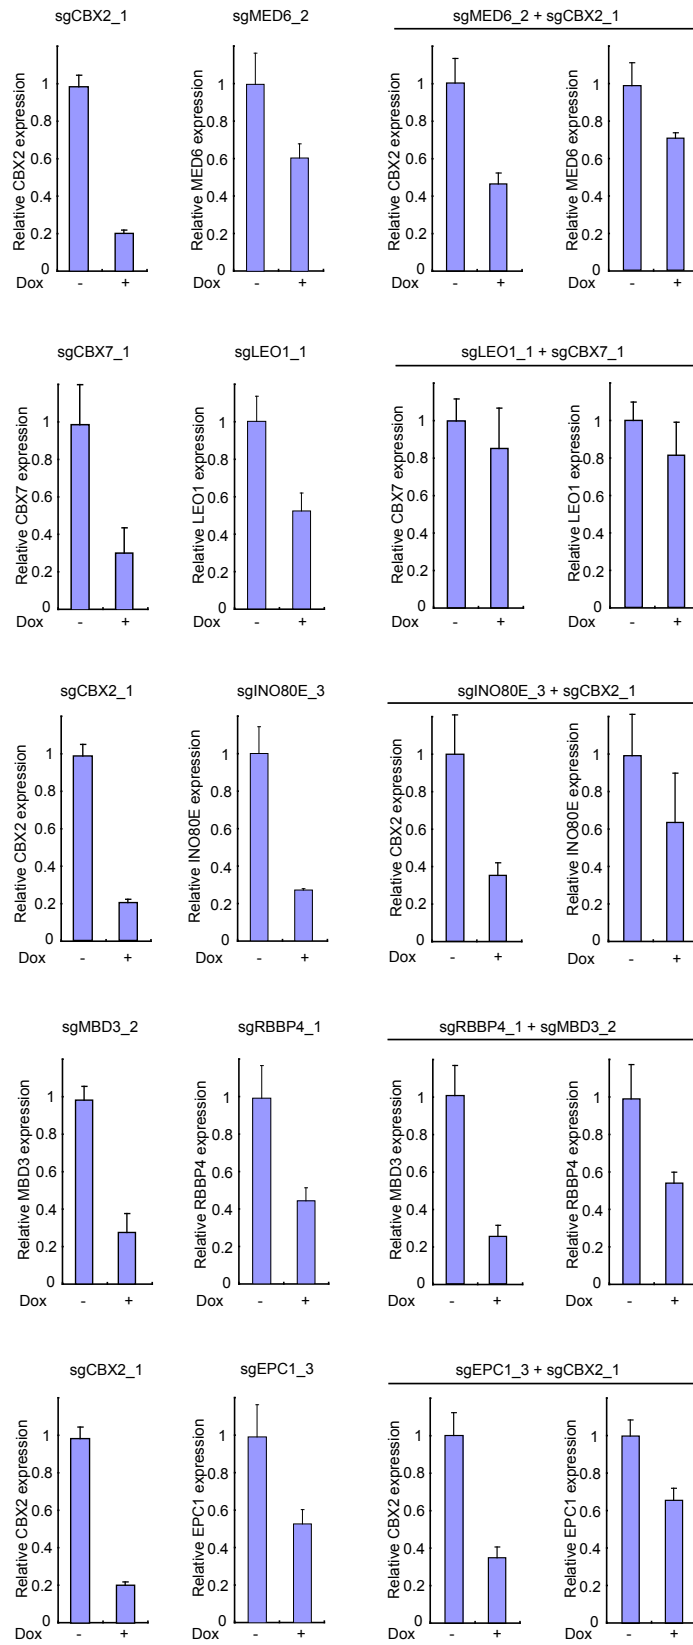

a (page 6 of 9)

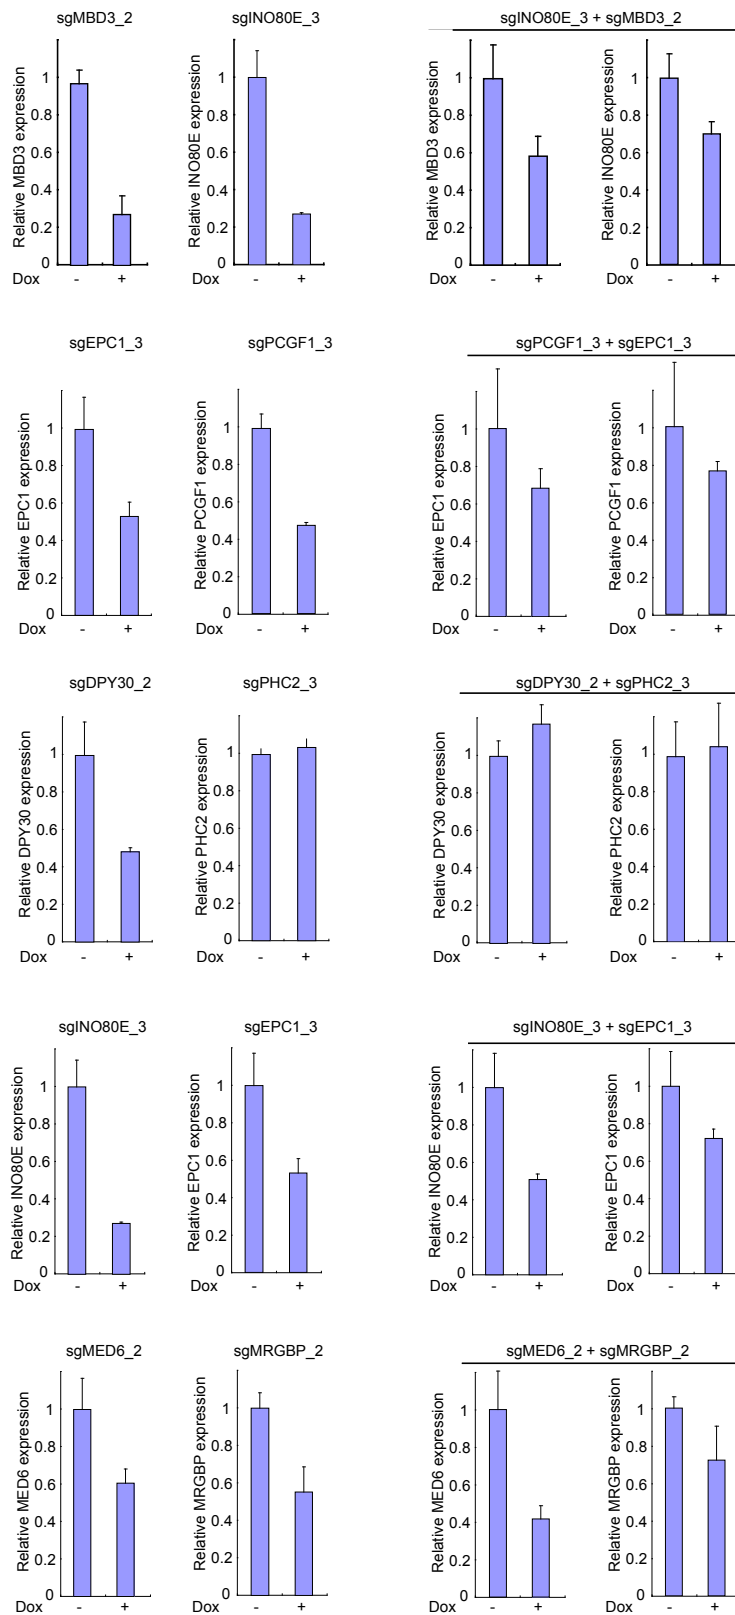

a (page 7 of 9)

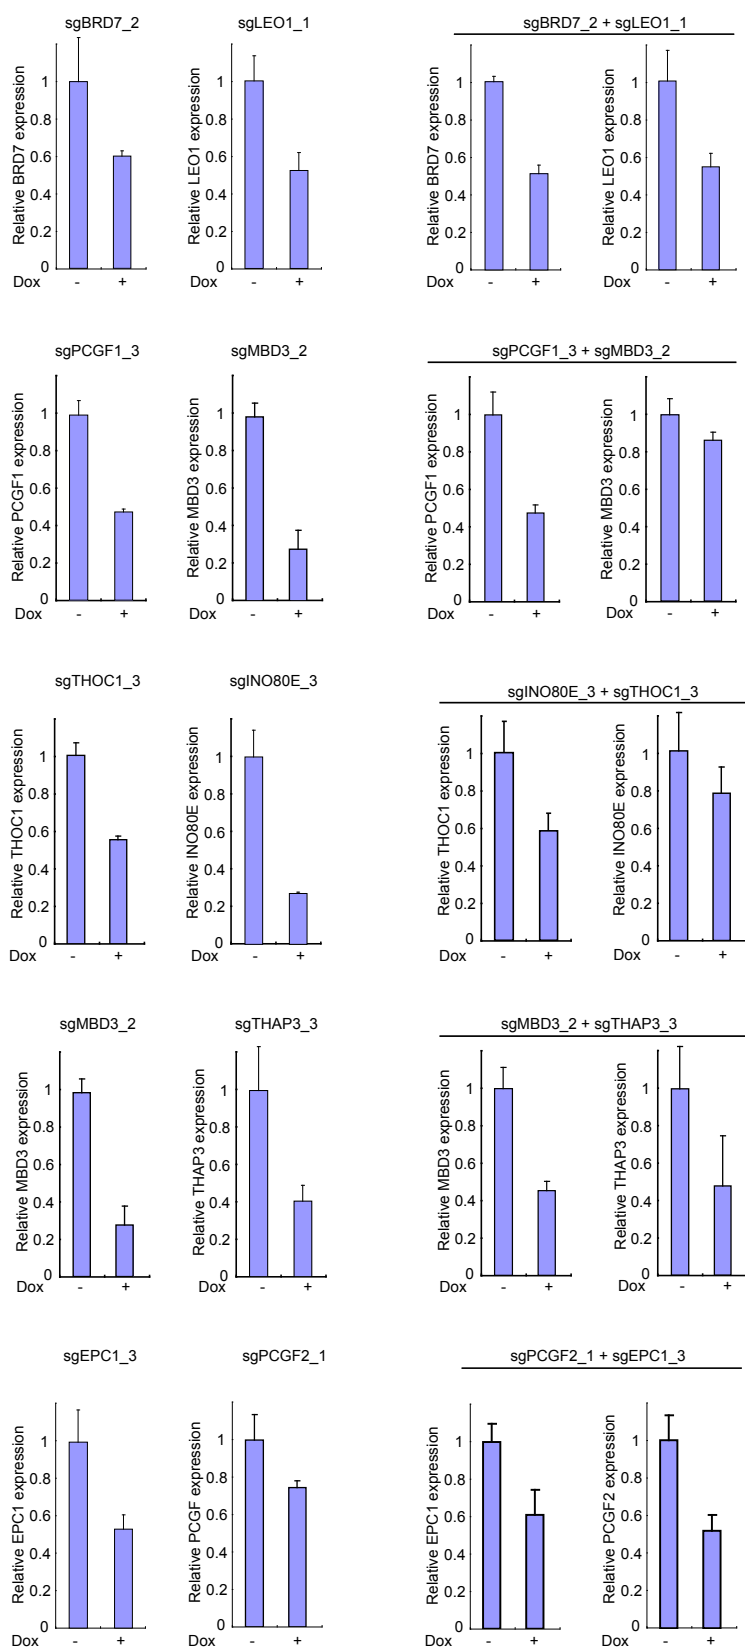

a (page 8 of 9)

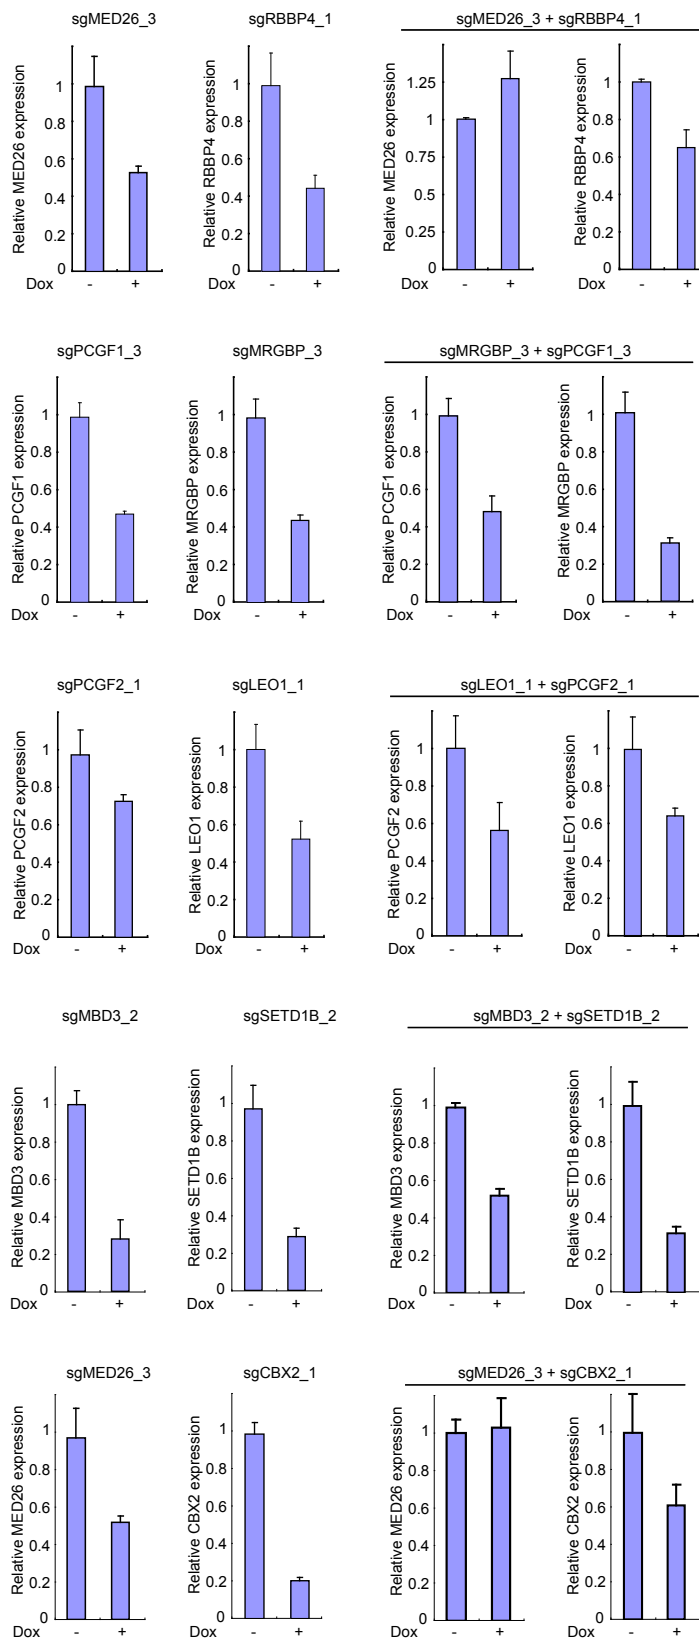

a (page 9 of 9)

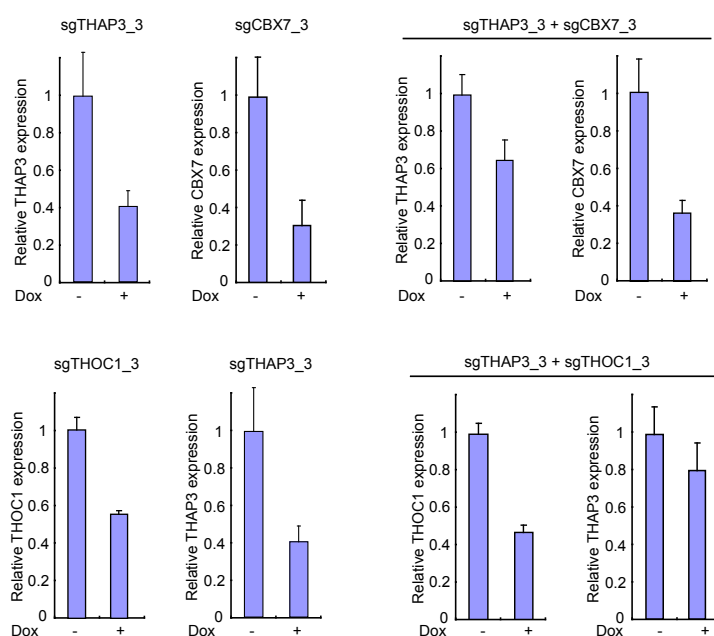

Figure S2 | Gene repression efficiencies of single and double sgRNA constructs.

(a) Quantitative PCR measurement of transcriptional repression efficiency for a set of single (28) and double (42) sgRNA constructs. Each row represents a pair of sgRNAs introduced into cells individually or as a pair. Horizontal bar charts represent growth phenotypes as observed in the pooled growth competition assay (similar to Figure S5f). (b) Representative examples of sgRNAs with similar (top), higher (middle) and lower (bottom) repression efficiencies comparing individual and pair-wise sgRNA knockdowns. The diagrams were replotted using the data in (a). (c) Overall (left) and cumulative (right) distribution of repression efficiency comparing individual and pair-wise sgRNA knockdowns based on the data in (a). Boxplot - red line: median; upper and lower box boundaries: 75th and 25th percentile of data; whiskers cover ca. 99% of the data assuming normal distribution (2.7 standard deviations); notches represent 95% confidence interval for the median; no outliers are shown (d) Doxycycline (Dox) induced growth phenotypes associated with positive (sgINTS9, sgGEMIN5 and sgPOLR1D) or negative control (sgNC) sgRNAs. "-Dox" and "+Dox" denote without or with Dox induction respectively. Error bars on each panel (a,b,d) indicate standard deviation.

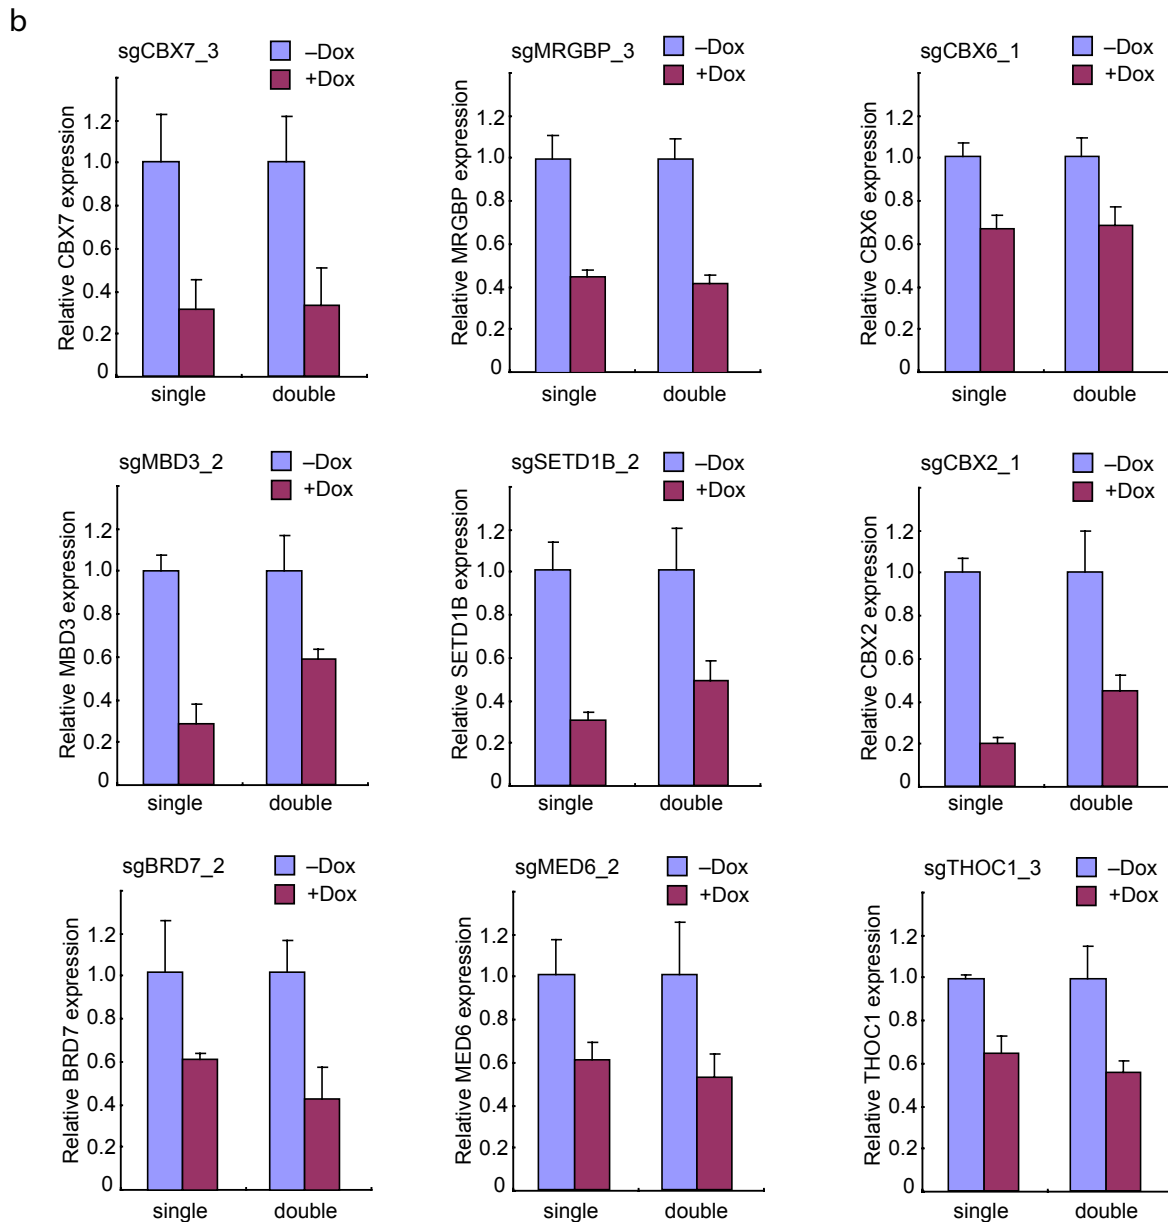

Figure S2 | Gene repression efficiencies of single and double sgRNA constructs.

(a) Quantitative PCR measurement of transcriptional repression efficiency for a set of single (28) and double (42) sgRNA constructs. Each row represents a pair of sgRNAs introduced into cells individually or as a pair. Horizontal bar charts represent growth phenotypes as observed in the pooled growth competition assay (similar to Figure S5f). (b) Representative examples of sgRNAs with similar (top), higher (middle) and lower (bottom) repression efficiencies comparing individual and pair-wise sgRNA knockdowns. The diagrams were replotted using the data in (a). (c) Overall (left) and cumulative (right) distribution of repression efficiency comparing individual and pair-wise sgRNA knockdowns based on the data in (a). Boxplot - red line: median; upper and lower box boundaries: 75th and 25th percentile of data; whiskers cover ca. 99% of the data assuming normal distribution (2.7 standard deviations); notches represent 95% confidence interval for the median; no outliers are shown (d) Doxycycline (Dox) induced growth phenotypes associated with positive (sgINTS9, sgGEMIN5 and sgPOLR1D) or negative control (sgNC) sgRNAs. “-Dox” and “+Dox” denote without or with Dox induction respectively. Error bars on each panel (a,b,d) indicate standard deviation.

c

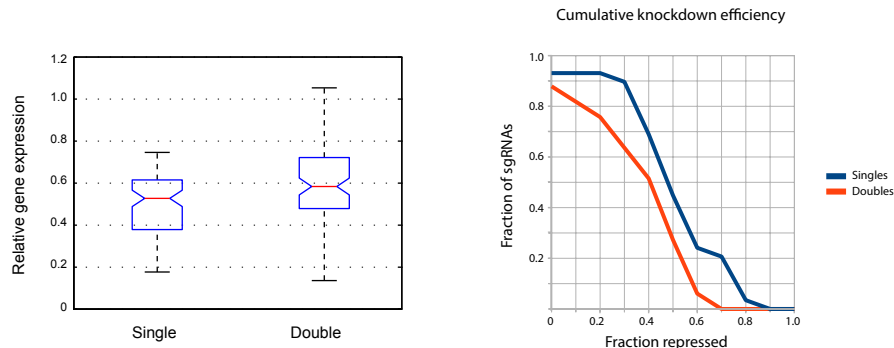

d

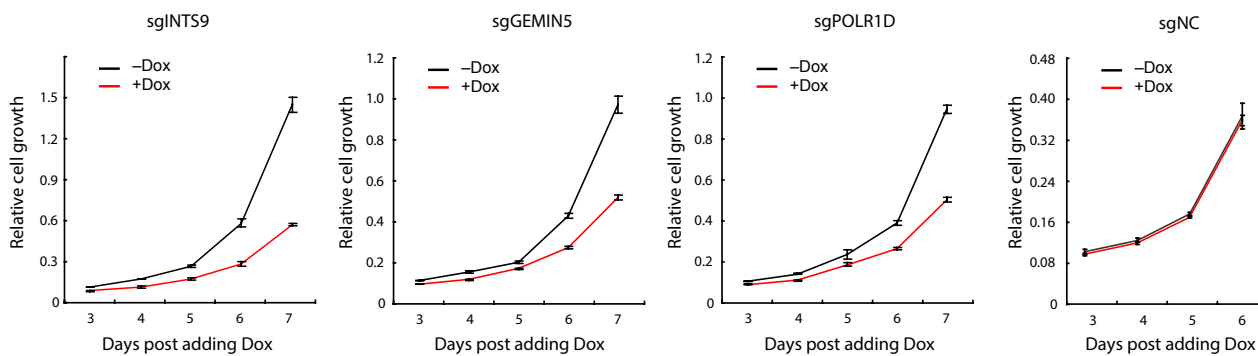

Figure S2 | Gene repression efficiencies of single and double sgRNA constructs.

(a) Quantitative PCR measurement of transcriptional repression efficiency for a set of single (28) and double (42) sgRNA constructs. Each row represents a pair of sgRNAs introduced into cells individually or as a pair. Horizontal bar charts represent growth phenotypes as observed in the pooled growth competition assay (similar to Figure S5f). (b) Representative examples of sgRNAs with similar (top), higher (middle) and lower (bottom) repression efficiencies comparing individual and pair-wise sgRNA knockdowns. The diagrams were replotted using the data in (a). (c) Overall (left) and cumulative (right) distribution of repression efficiency comparing individual and pair-wise sgRNA knockdowns based on the data in (a). Boxplot - red line: median; upper and lower box boundaries: 75th and 25th percentile of data; whiskers cover ca. 99% of the data assuming normal distribution (2.7 standard deviations); notches represent 95% confidence interval for the median; no outliers are shown (d) Doxycycline (Dox) induced growth phenotypes associated with positive (sgINTS9, sgGEMIN5 and sgPOLR1D) or negative control (sgNC) sgRNAs. "-Dox" and "+Dox" denote without or with Dox induction respectively. Error bars on each panel (a,b,d) indicate standard deviation.



Supplementary Figure 3 - Template switching and PCR conditions optimization.

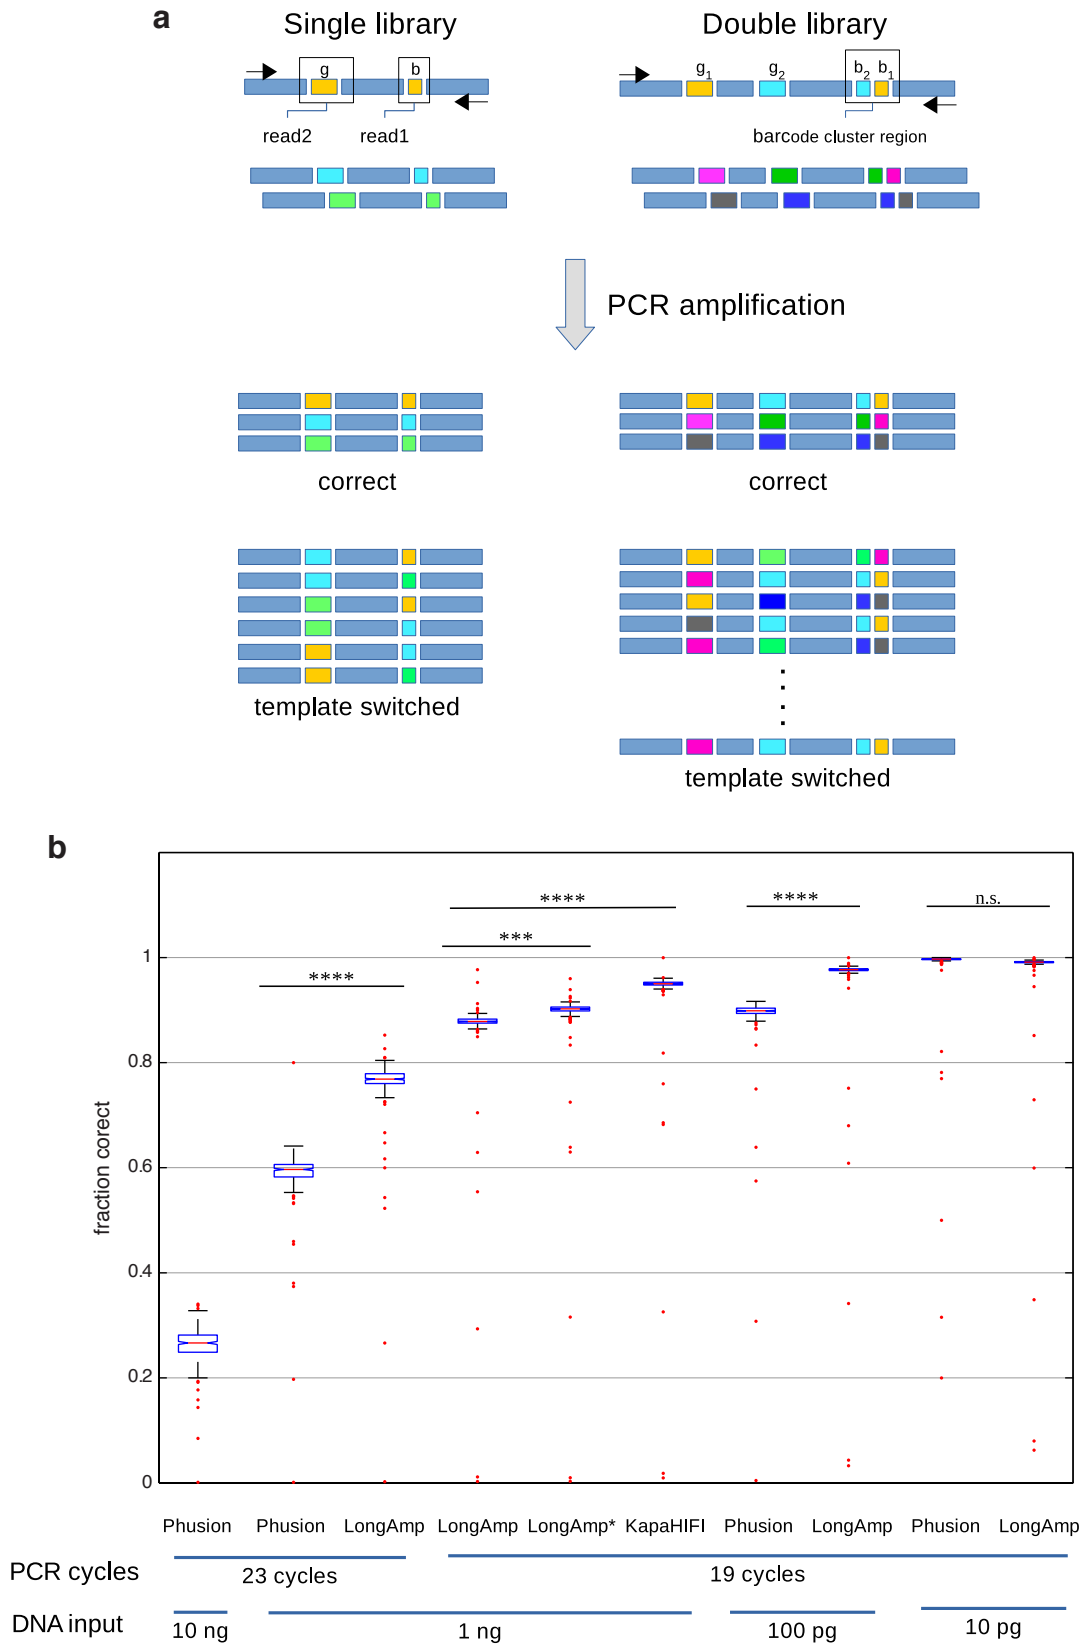

**Figure S3 | Template switching and PCR conditions optimization.**

(a) Schematic representation of the template switching phenomenon during PCR amplification for single (left) and double (right) sgRNA constructs. Upon PCR amplification both correct (top) and incorrect (bottom) products can be generated. sgRNAs and barcode sequences are denoted with g, g<sub>1</sub>, g<sub>2</sub> and b, b<sub>1</sub>, b<sub>2</sub> respectively. Regions with high sequence identity are shown in light blue. Sequenced regions are boxed. (b) Optimization of PCR conditions. The fraction of correct products are plotted for each set of conditions (DNA polymerase used, PCR cycle number, and the amount of template DNA). Individual experimental conditions are compared using a t-test and p-values (\*\*\*)  $\leq 10^{-3}$ ; \*\*\*\*  $\leq 10^{-4}$ ; n.s. - not significant).

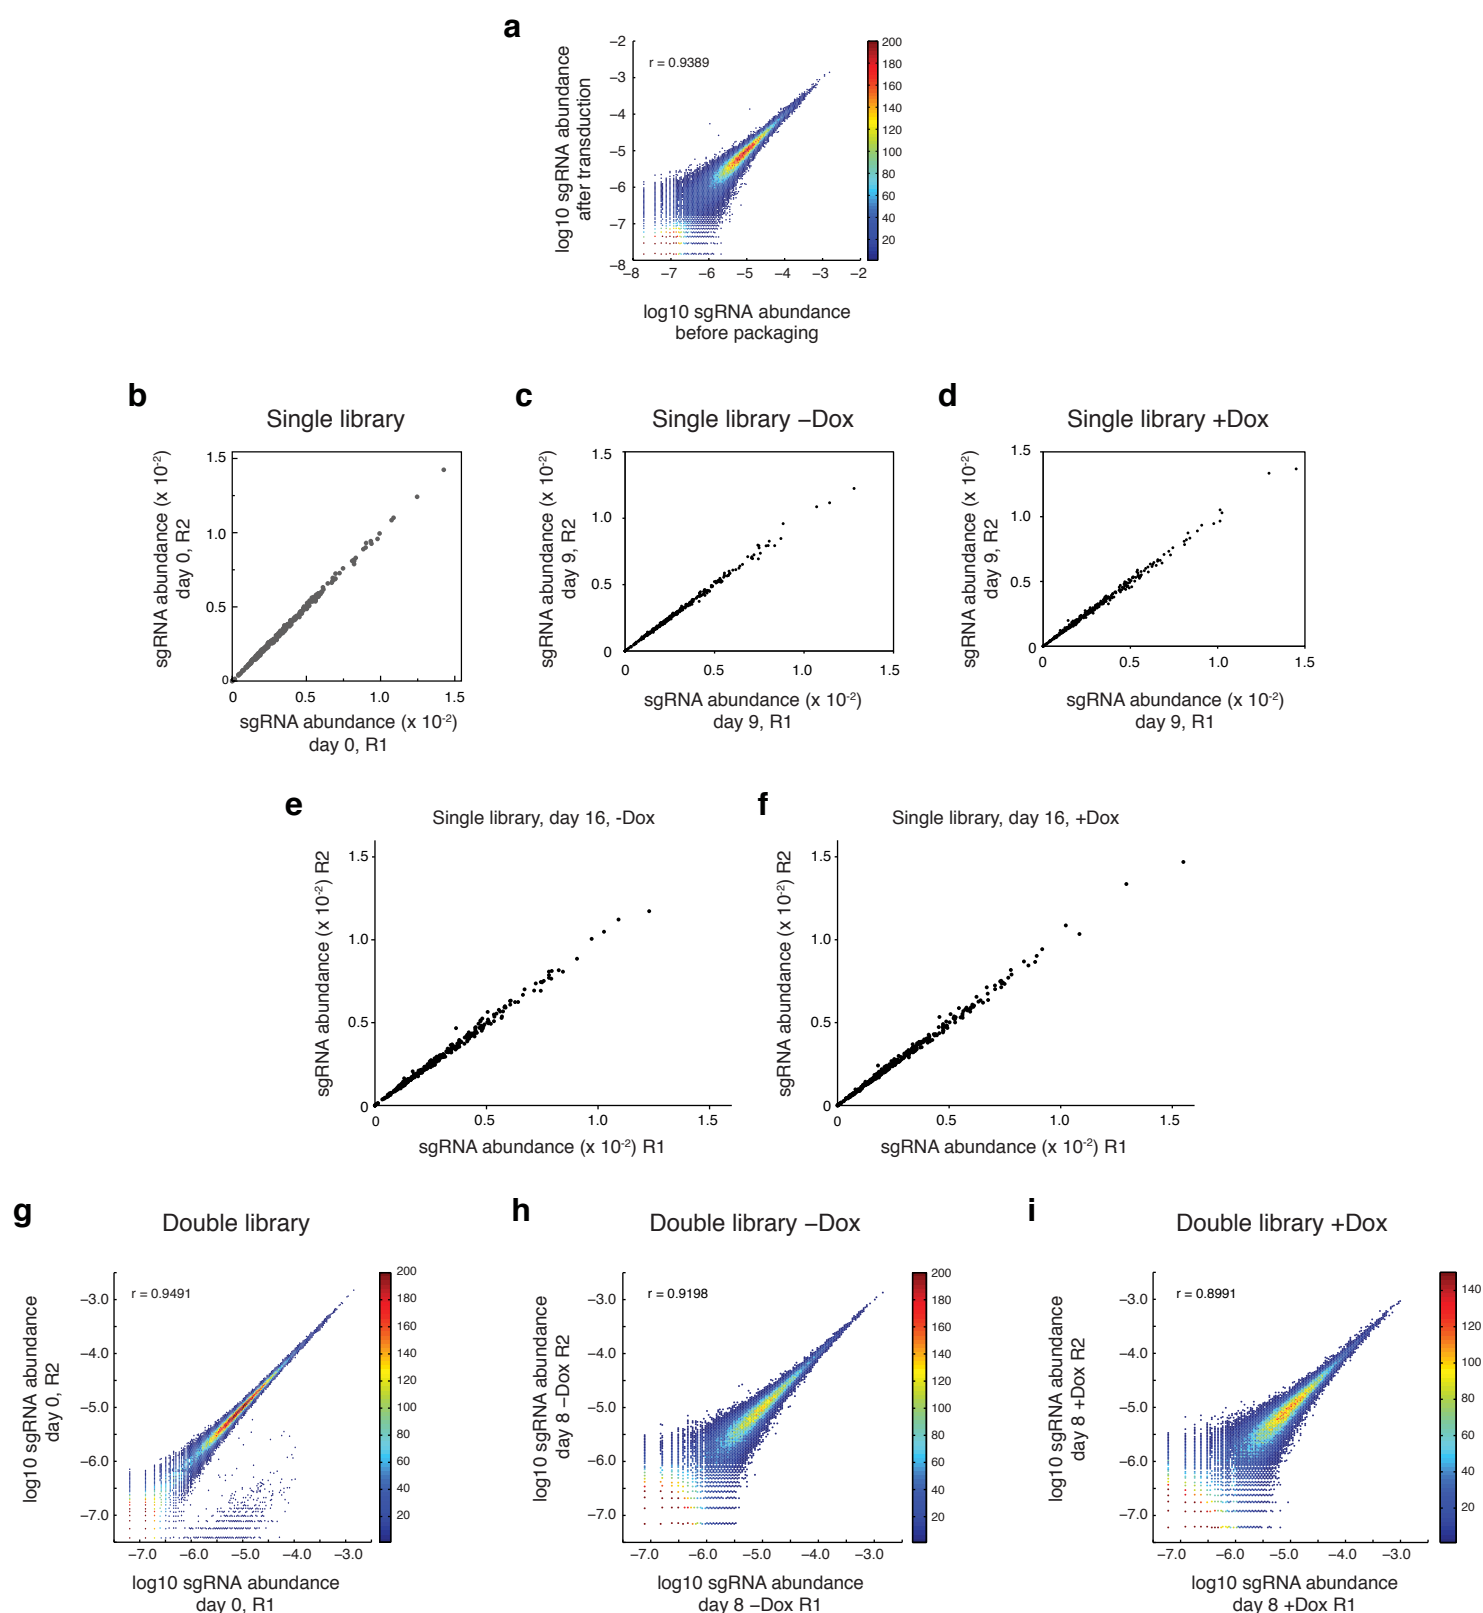

**Figure S4 | Platform quality control.**

(a) Correlation of double sgRNA construct abundance in the double library before packaging and after packaging and transduction into HEK293-dCas9-KRAB cells. (b-f) Replicate correlations for single sgRNA library at different time points without (-Dox) and with (+Dox) induction. (g-i) Replicate correlations for double sgRNA library at different time points without (-Dox) and with (+Dox) induction. (j-k) Comparison of single (j) and double (k) sgRNA library abundance without Dox induction at different time points to the day 0 sample. (l-m) Comparison of single sgRNA library abundance without Dox (-Dox, grey) or with Dox (+Dox, blue) induction at day 9 (l) and day 16 (m) to day 0. (n-o) Comparison of double sgRNA library distribution without Dox (-Dox, red) or with Dox (+Dox, blue) at day 8 (n) and day 16 (o) to day 0. (p-q) Reproducibility of enrichment/depletion patterns of +Dox/-Dox at day 16 between two biological replicates for single (p) and double (q) sgRNA libraries. The data in (q) was subjected to initial filtering as described in 'Data processing and analysis'.

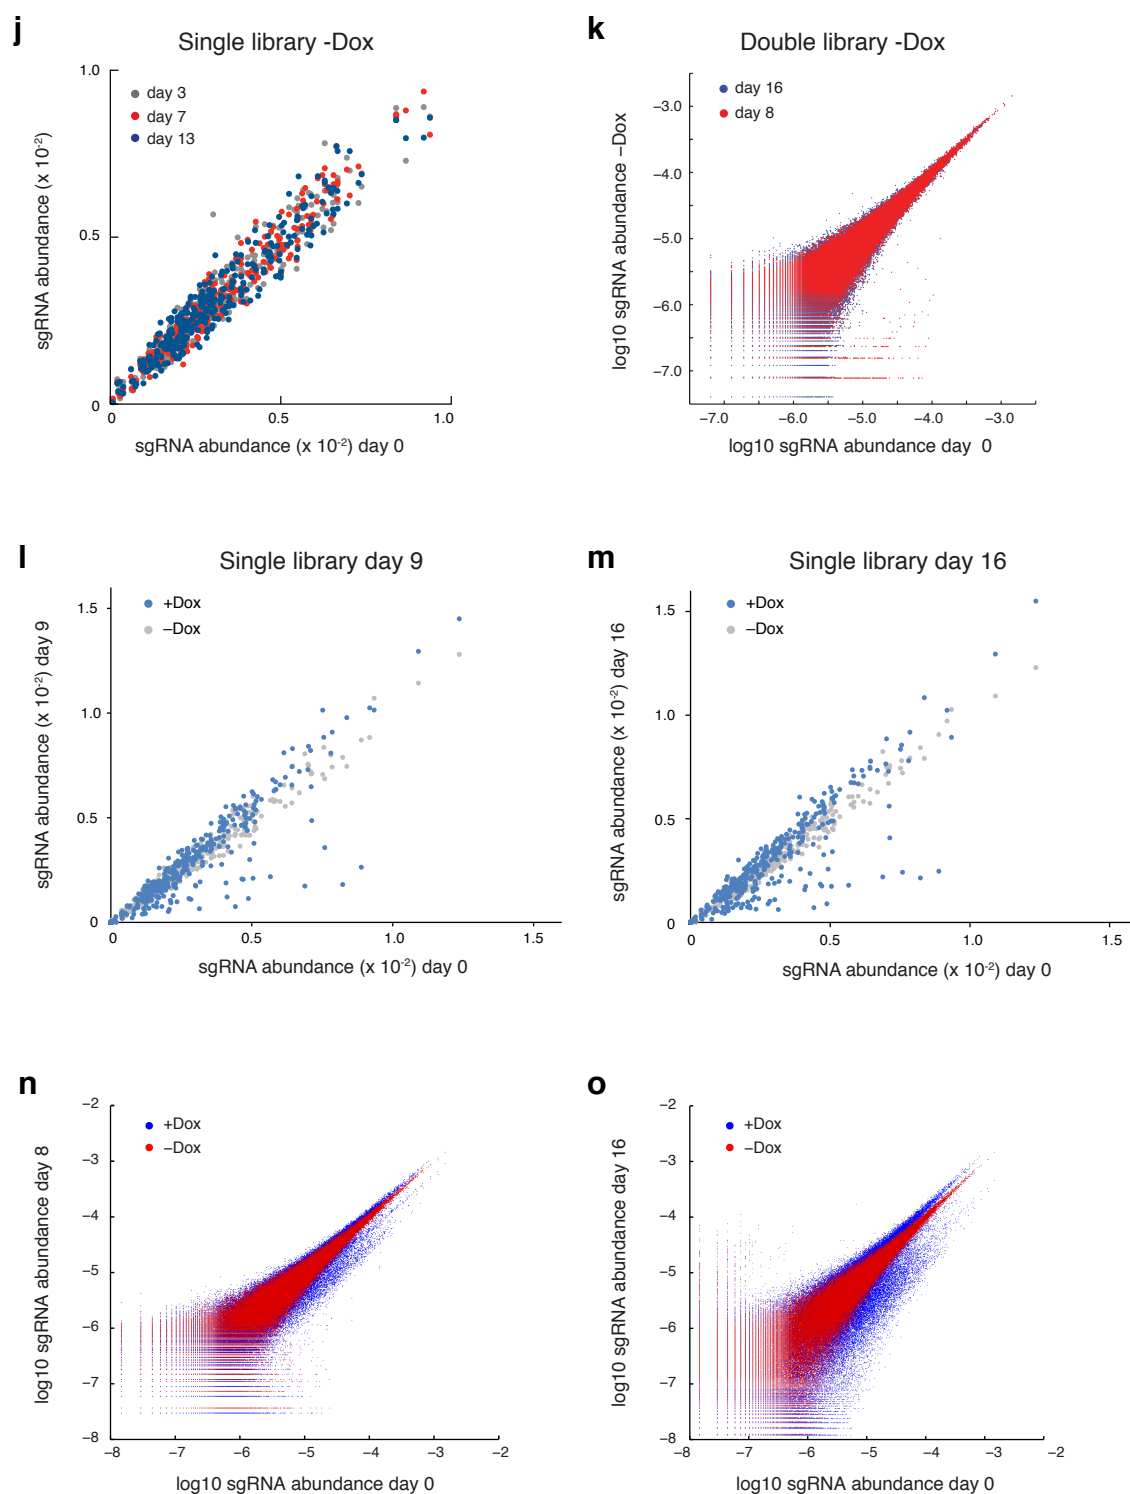

**Figure S4 | Platform quality control.**

(a) Correlation of double sgRNA construct abundance in the double library before packaging and after packaging and transduction into HEK293-dCas9-KRAB cells. (b-f) Replicate correlations for single sgRNA library at different time points without (-Dox) and with (+Dox) induction. (g-i) Replicate correlations for double sgRNA library at different time points without (-Dox) and with (+Dox) induction. (j-k) Comparison of single (j) and double (k) sgRNA library abundance without Dox induction at different time points to the day 0 sample. (l-m) Comparison of single sgRNA library abundance without Dox (-Dox, grey) or with Dox (+Dox, blue) induction at day 9 (l) and day 16 (m) to day 0. (n-o) Comparison of double sgRNA library distribution without Dox (-Dox, red) or with Dox (+Dox, blue) at day 8 (n) and day 16 (o) to day 0. (p-q) Reproducibility of enrichment/depletion patterns of +Dox/-Dox at day 16 between two biological replicates for single (p) and double (q) sgRNA libraries. The data in (q) was subjected to initial filtering as described in 'Data processing and analysis'.

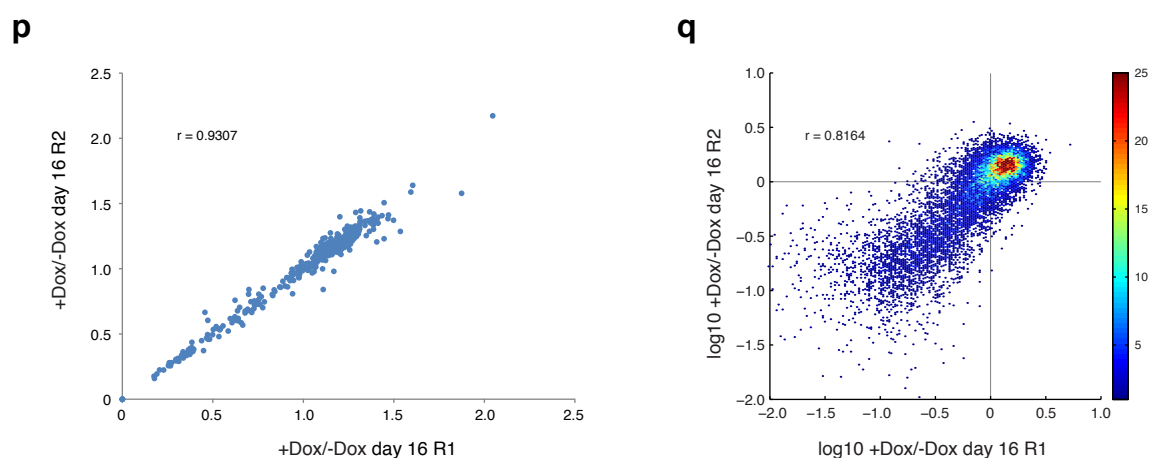

**Figure S4 | Platform quality control.**

(a) Correlation of double sgRNA construct abundance in the double library before packaging and after packaging and transduction into HEK293-dCas9-KRAB cells. (b-f) Replicate correlations for single sgRNA library at different time points without (-Dox) and with (+Dox) induction. (g-i) Replicate correlations for double sgRNA library at different time points without (-Dox) and with (+Dox) induction. (j-k) Comparison of single (j) and double (k) sgRNA library abundance without Dox induction at different time points to the day 0 sample. (l-m) Comparison of single sgRNA library abundance without Dox (-Dox, grey) or with Dox (+Dox, blue) induction at day 9 (l) and day 16 (m) to day 0. (n-o) Comparison of double sgRNA library distribution without Dox (-Dox, red) or with Dox (+Dox, blue) at day 8 (n) and day 16 (o) to day 0. (p-q) Reproducibility of enrichment/depletion patterns of +Dox/-Dox at day 16 between two biological replicates for single (p) and double (q) sgRNA libraries. The data in (q) was subjected to initial filtering as described in ‘Data processing and analysis’.

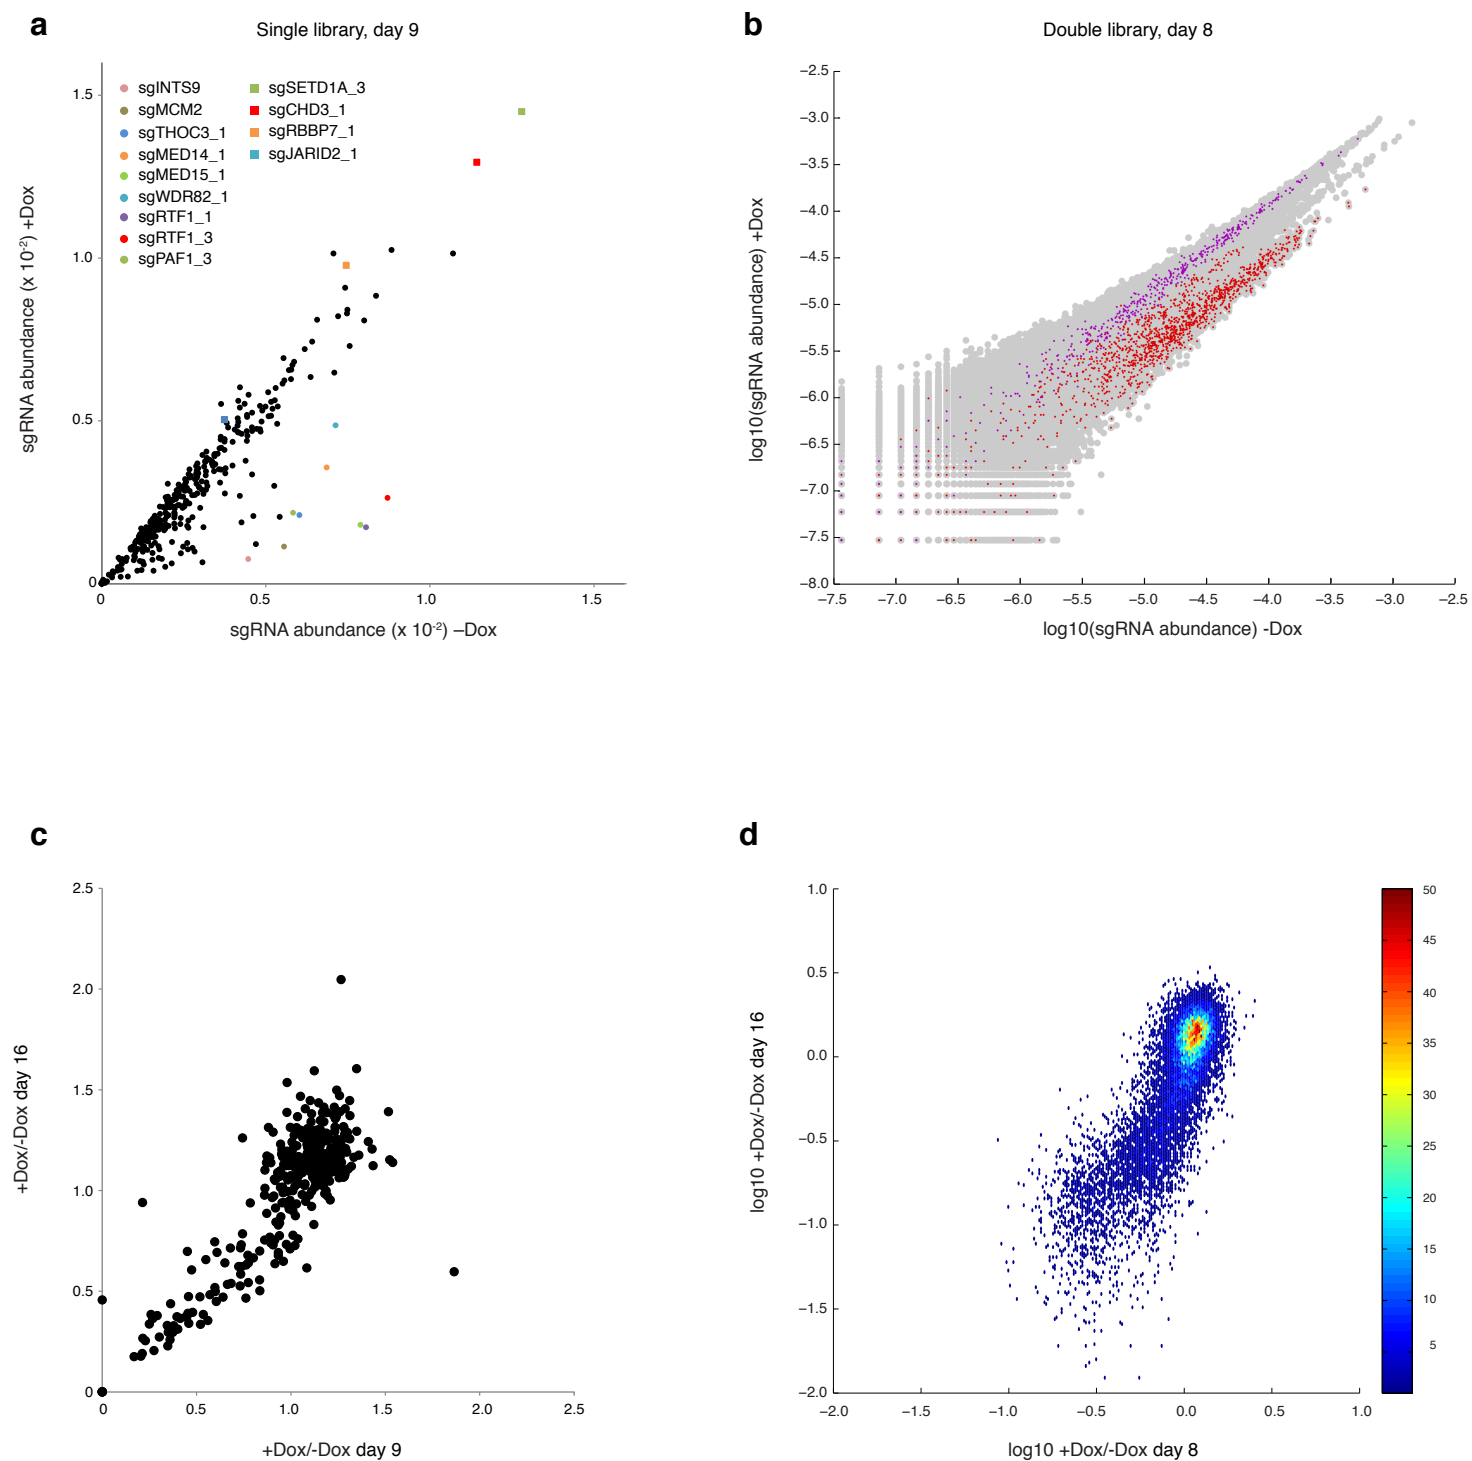

**Figure S5 | Comparison of single and double sgRNA libraries at intermediate time points.**

(a) Comparison of the single sgRNA library with and without Dox at day 9. The colored dots show representative depleted sgRNAs and the colored squares show enriched sgRNAs. (b) Comparison of the double sgRNA library (grey) with and without Dox at day 8. Purple dots, negative control sgRNA pairs; red dots, positive control sgRNA pairs. (c-d) Time-dependent enrichment/depletion patterns (+Dox/-Dox) for single (c) and double (d) sgRNA screens. The data in (d) was subjected to initial filtering as described in ‘Data processing and analysis’. (e-f) The time-dependent depletion pattern of single sgRNAs (e) and pairs of sgRNAs (f). Positive controls are marked in red.

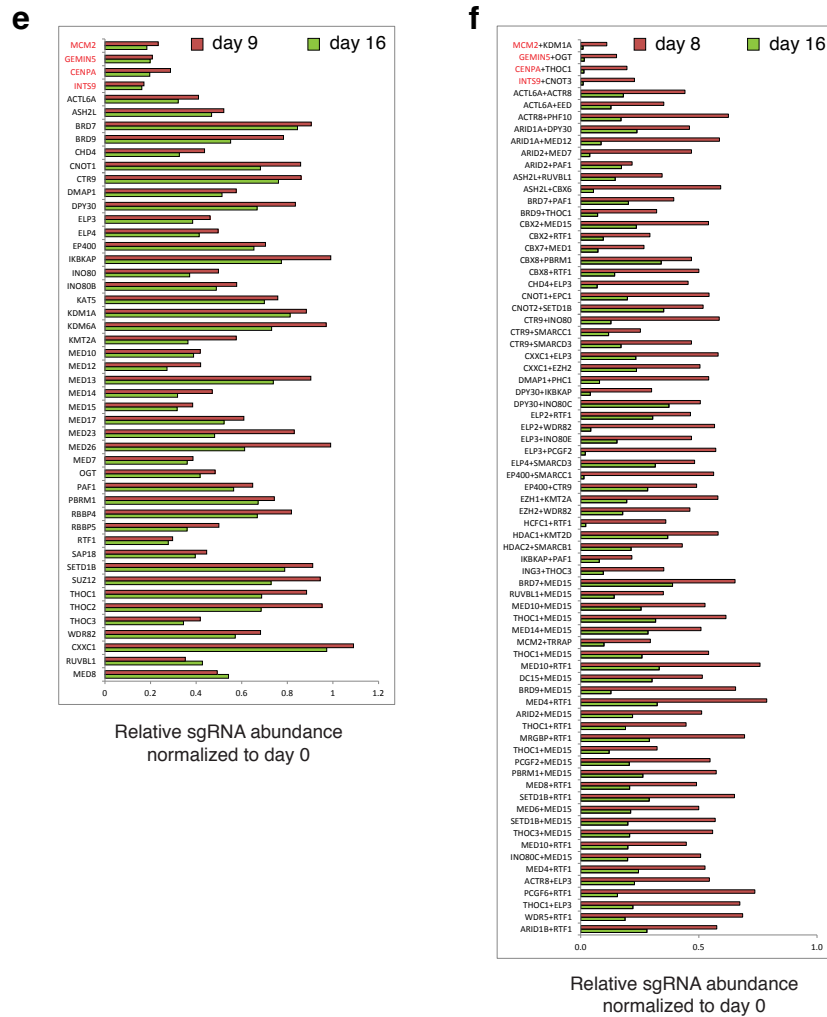

**Figure S5 | Comparison of single and double sgRNA libraries at intermediate time points.**

(a) Comparison of the single sgRNA library with and without Dox at day 9. The colored dots show representative depleted sgRNAs and the colored squares show enriched sgRNAs. (b) Comparison of the double sgRNA library (grey) with and without Dox at day 8. Purple dots, negative control sgRNA pairs; red dots, positive control sgRNA pairs. (c-d) Time-dependent enrichment/depletion patterns (+Dox/-Dox) for single (c) and double (d) sgRNA screens. The data in (d) was subjected to initial filtering as described in 'Data processing and analysis'. (e-f) The time-dependent depletion pattern of single sgRNAs (e) and pairs of sgRNAs (f). Positive controls are marked in red.

Supplementary Figure 6 - Choice of two pairs for validation by CRISPRi of gene expression and growth effects.

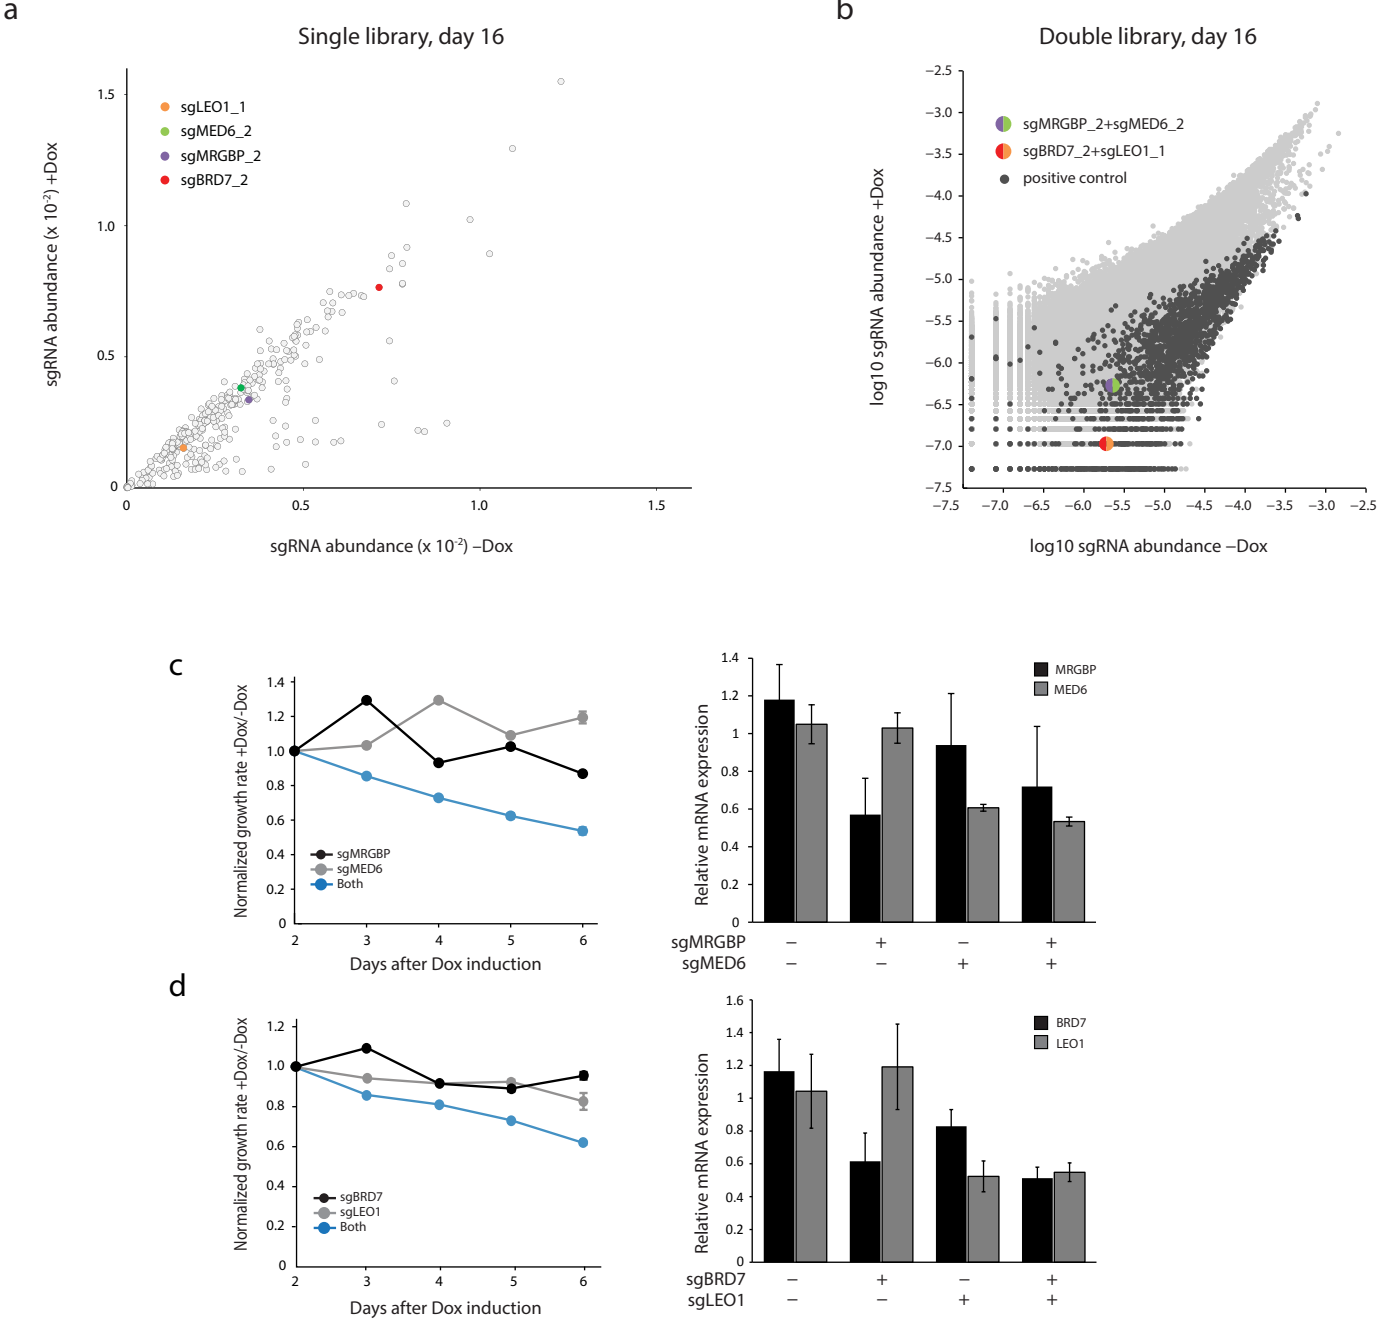

Figure S6 | Choice of two pairs for validation by CRISPRi of gene expression and growth effects. The colored dots show their sgRNA (pairs) enrichment in the single screen (a) and the double screen (b). (c-d) Measurement of two pairwise sgRNAs combinations (MRGBP & MED6 and BRD7 & LEO1) for cell proliferation suppression (left) and target gene repression (right).

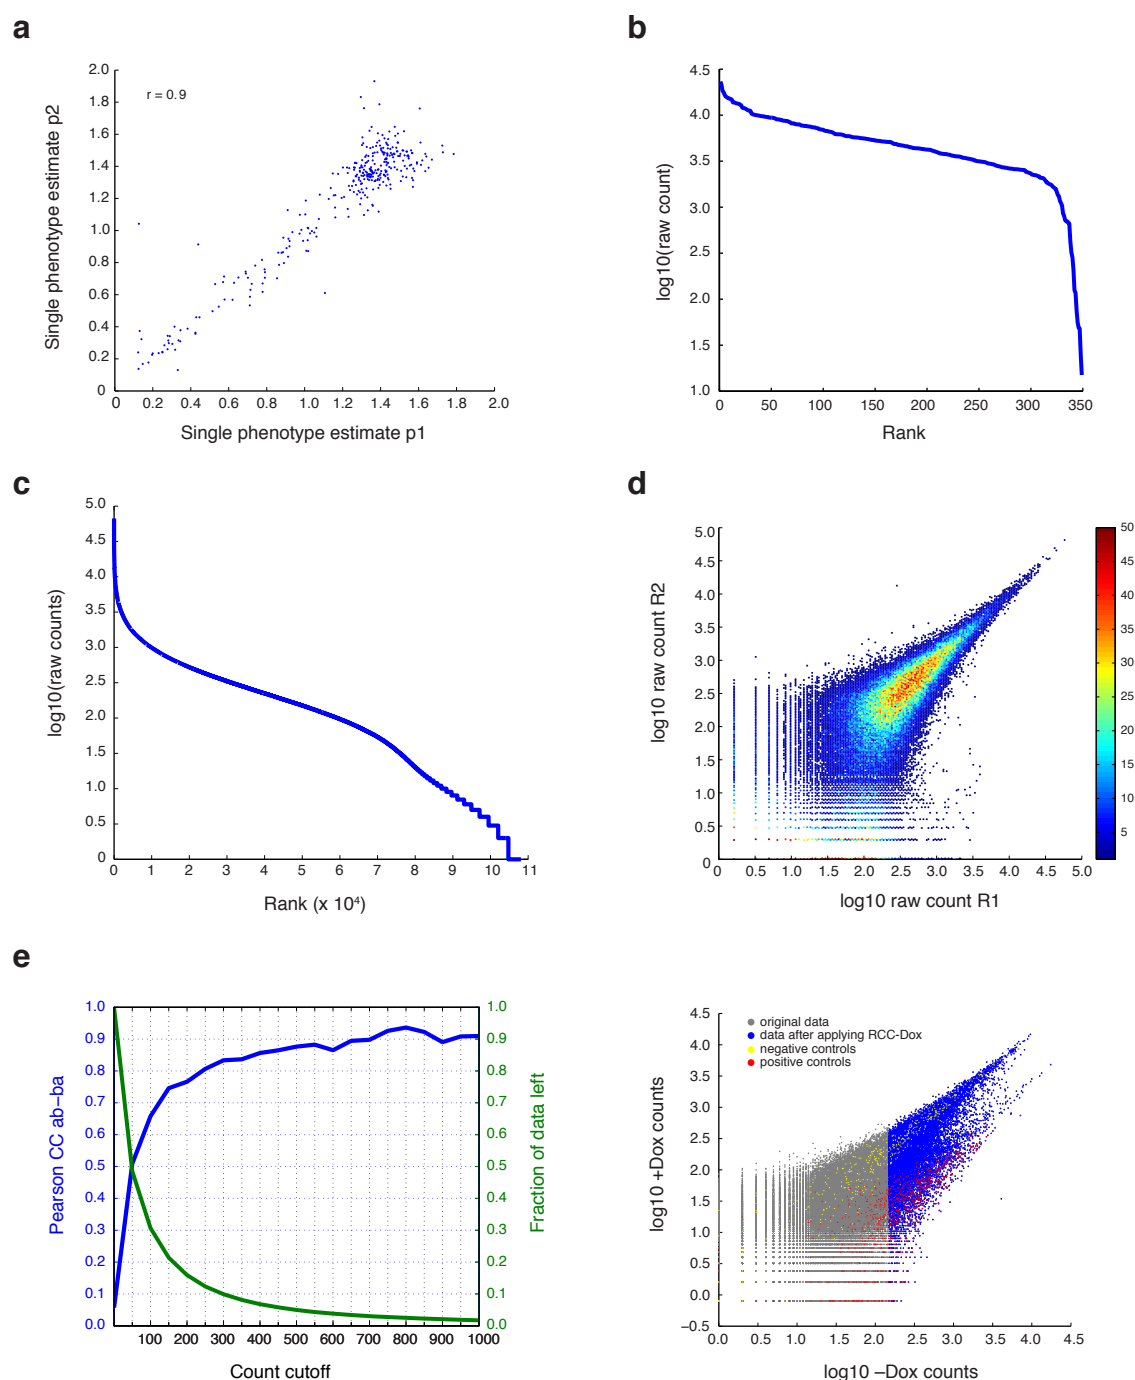

**Figure S7 I Data processing and analysis.**

(a) Comparison of single phenotype estimates derived from pairs where a given sgRNA is either in position 1 (p1, x-axis) or position 2 (p2, y-axis). The Pearson correlation coefficient ( $r$ ) is also shown. (b) Distribution of raw sgRNA counts for the single sgRNA library ( $\log_{10}$  scale). (c) Distribution of raw sgRNA counts for the double sgRNA library ( $\log_{10}$  scale). (d) Data reproducibility of +Dox/-Dox between biological replicates of double sgRNAs screens. The low counts region shows a high level of variability. (e) Initial data filtering. (Left) Dataset CCAB-BA (blue) and fraction remaining data (green) as a function of the raw count cutoff for the -Dox sample (RCC-Dox). Higher RCC-Dox values produce a better overall quality dataset at the expense of losing a fraction of the raw data (green, as percentage of all observed pairs); (Right) A scatter plot of log transformed raw counts before (grey) and after (blue) filtering by RCC-Dox. The positive controls (red) and negative controls (yellow) are annotated. (f) Data filtering based on number of replicates (in this case  $\geq 3$ ). Replicate count matrices where each data point represents the number of replicate data points available for each sgRNA-A:sgRNA-B combination before (left) and after the filtering (right) are shown. Missing data is in black. (g) Selection of T1 and T2 during the data collapsing step. To saturate the combinatorial space T1 was sampled in the interval [0.1:1] with a step of 0.1 and T2 in interval [0:T1-0.1] (missing data is in black). (Left) CCAB-BA as a function of T1 and T2; (Right) Number of genes in the final dataset as a function of T1 and T2.



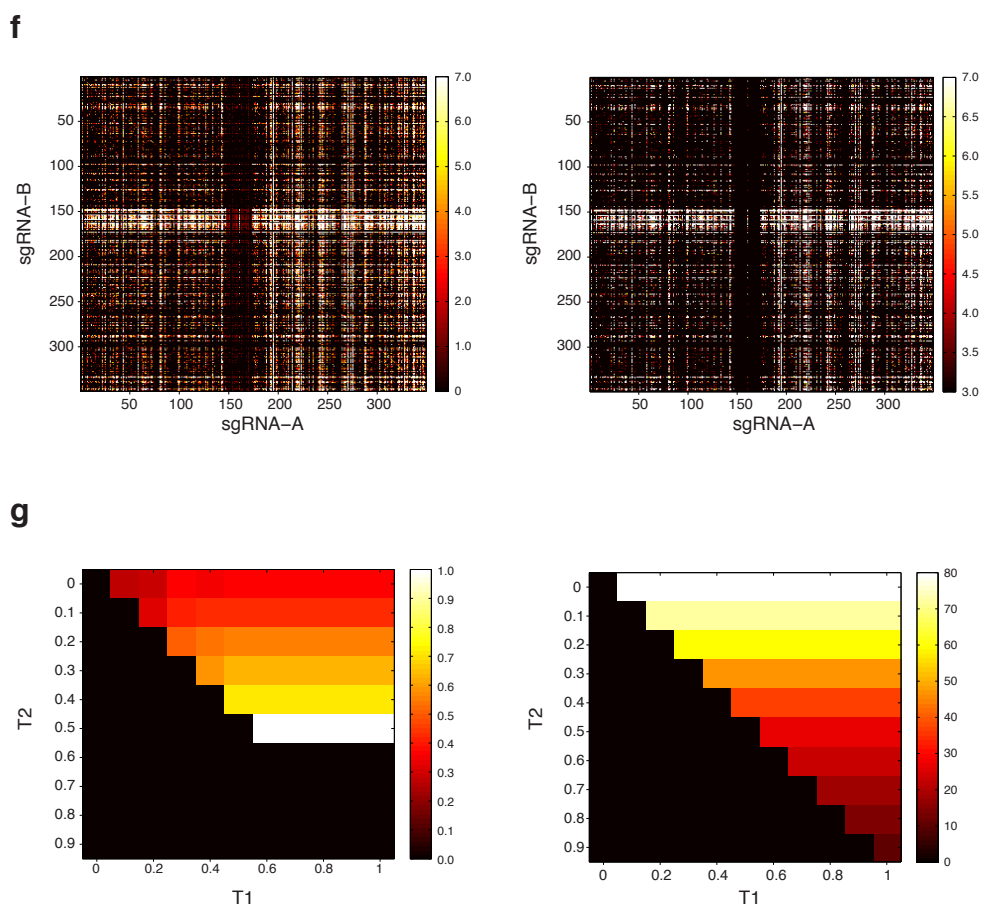

### Figure S7 I Data processing and analysis.

(a) Comparison of single phenotype estimates derived from pairs where a given sgRNA is either in position 1 (p1, x-axis) or position 2 (p2, y-axis). The Pearson correlation coefficient ( $r$ ) is also shown. (b) Distribution of raw sgRNA counts for the single sgRNA library (log<sub>10</sub> scale). (c) Distribution of raw sgRNA counts for the double sgRNA library (log<sub>10</sub> scale). (d) Data reproducibility of +Dox/-Dox between biological replicates of double sgRNAs screens. The low counts region shows a high level of variability. (e) Initial data filtering. (Left) Dataset CCAB-BA (blue) and fraction remaining data (green) as a function of the raw count cutoff for the -Dox sample (RCC-Dox). Higher RCC-Dox values produce a better overall quality dataset at the expense of losing a fraction of the raw data (green, as percentage of all observed pairs); (Right) A scatter plot of log transformed raw counts before (grey) and after (blue) filtering by RCC-Dox. The positive controls (red) and negative controls (yellow) are annotated. (f) Data filtering based on number of replicates (in this case  $\geq 3$ ). Replicate count matrices where each data point represents the number of replicate data points available for each sgRNA-A:sgRNA-B combination before (left) and after the filtering (right) are shown. Missing data is in black. (g) Selection of T1 and T2 during the data collapsing step. To saturate the combinatorial space T1 was sampled in the interval [0.1:1] with a step of 0.1 and T2 in interval [0:T1-0.1] (missing data is in black). (Left) CCAB-BA as a function of T1 and T2; (Right) Number of genes in the final dataset as a function of T1 and T2.

Supplementary Figure 8 - Rapamycin-genetic screen using CRISPRi platform.

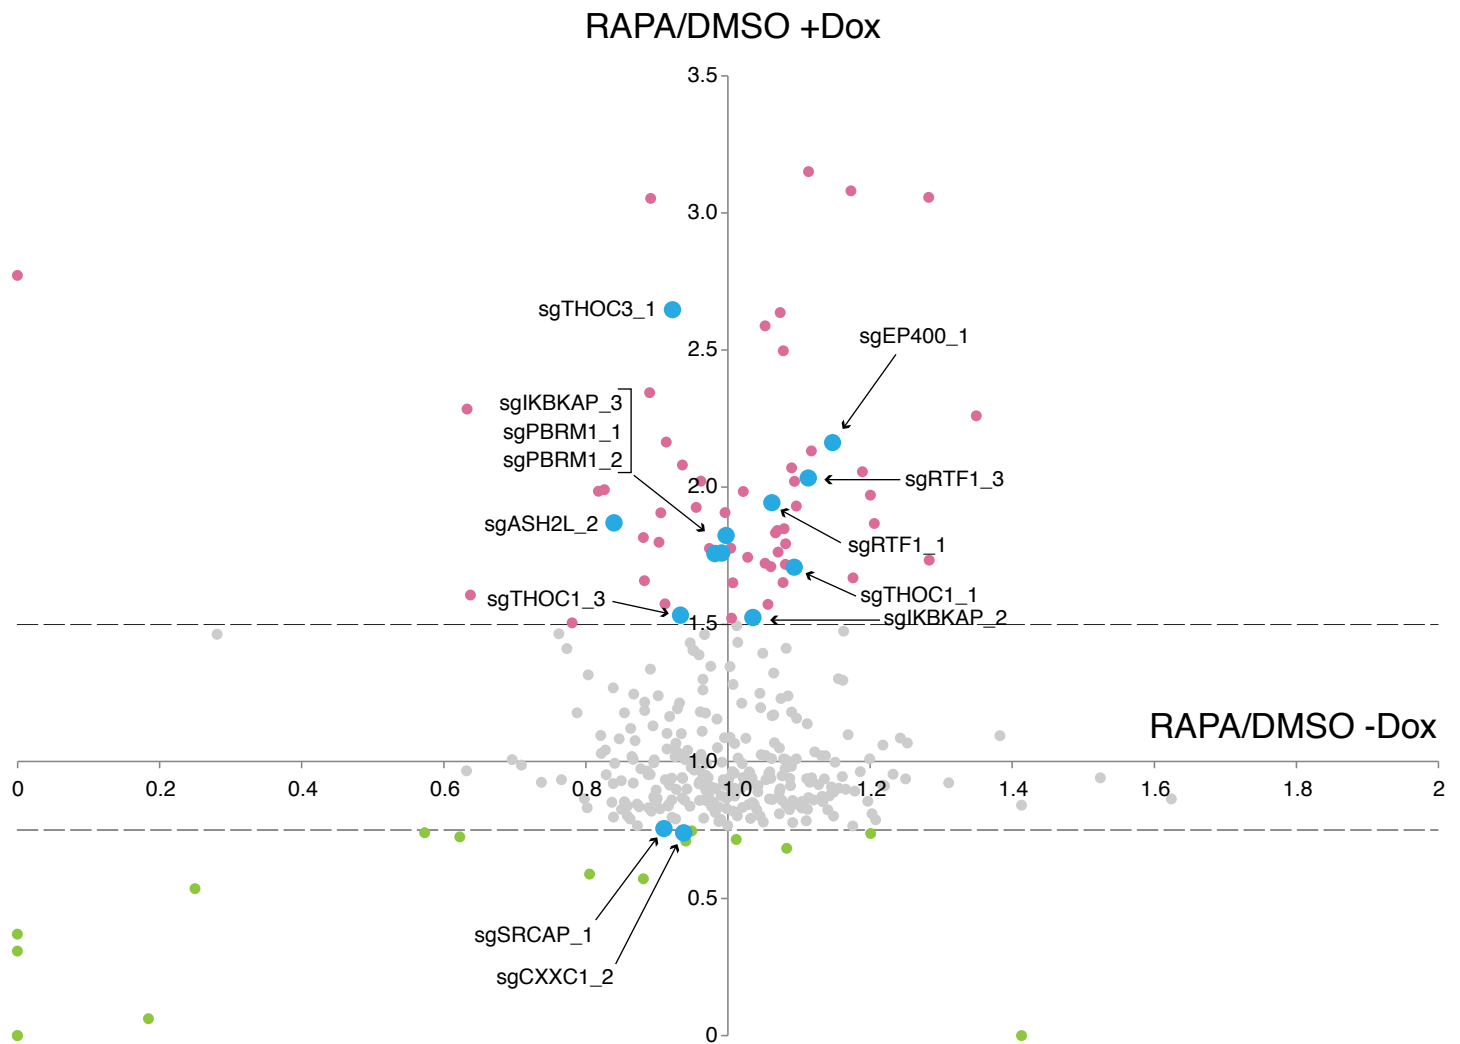

**Figure S8 | Rapamycin-genetic screen using CRISPRi platform.**

Comparison of single library with and without Dox induction after 20 days of Rapamycin treatment. The sgRNA representations were normalized using DMSO control with and without Dox induction to normalize out the sgRNA-mediated growth effects. Cutoffs for protective/sensitizing hits were set at 1.5 and 0.75 respectively and data points falling outside of these values are colored in pink (>1.5) and in green (<0.75). Hits listed in Supplementary Tables 4 and 5 are also annotated.

**Supplementary Table 1 | Target genes and sgRNA sequences**

| sgRNA name | sgRNA sequence         |
|------------|------------------------|
| ACTL6A_1   | GTGGGTGGCGGTGGAAGTTA   |
| ACTL6A_2   | GGCCGCGACTGCGAGTCTCG   |
| ACTL6A_3   | GCGCCGGCAGCAGCCATGAG   |
| ACTR8_1    | GCGCTGCAGCCACGACTGCC   |
| ACTR8_2    | GTCTCCGGCCATAATGACCC   |
| ACTR8_3    | GCGGCCCATCGTGCCCGCGC   |
| ARID1A_1   | GGCTCTGTAGGCTCGGGACC   |
| ARID1A_2   | GGAGAAGACGAAGACAGGGC   |
| ARID1A_3   | GCCCCCTCATTCCCAGGCA    |
| ARID1B_1   | GCATCCTCTTCCTCCTCGTC   |
| ARID1B_2   | GGGAGCAGCCCCGTCTCCA    |
| ARID1B_3   | GAGGCGGCTCTCAAGGAGGG   |
| ARID2_1    | GGAAGTCCCGCAGCTCGTCC   |
| ARID2_2    | GAACCGGGGGGCAGCGCCG    |
| ARID2_3    | GGGTCCCGGCTGACAAGTG    |
| ASH2L_1    | GGAGCGGTCGCAAATGCAAC   |
| ASH2L_2    | GCAGCCGCTCCTCCTGGAGA   |
| ASH2L_3    | GTGGCCGTGATGGCGGCGGC   |
| BRD7_1     | GTCGGACAAACACCTCTACG   |
| BRD7_2     | GGGCTTCCGCTCTTTCCAG    |
| BRD7_3     | GCAGGCCCAGGCCGGCGAAG   |
| BRD9_1     | GCTGGCACCCGGTCGGACCT   |
| BRD9_2     | GAGTGGCGCTCGTCTACGA    |
| BRD9_3     | GCGAGCGCGGGCGGCCAGCC   |
| CBX2_1     | GTACTIONCAGCTTGCCCTGCG |
| CBX2_2     | GCTGAGCAGCGTGGGCGAGC   |
| CBX6_1     | GTGGGTGCCGCTGAGCAAGA   |
| CBX6_2     | GCTGTCTGCAGTGGGCGAGC   |
| CBX6_3     | GCATCGAGTACCTGGTGAAA   |
| CBX7_1     | GCTGTCAGCCATCGGCGAGC   |
| CBX7_2     | GTGCGGAAGGTGAGGCTGCC   |
| CBX7_3     | GCACCGCTCCCTCCACGCTG   |
| CBX8_1     | GCTCCTGGAAGCGGCCAAGG   |
| CBX8_2     | GGTGGGGGAGCGGGTGTTCG   |
| CBX8_3     | GCACGGAGGCCCTAGGCCCG   |
| CHD3_1     | GCTCCACTCGGGCTTGGGG    |
| CHD3_2     | GTCTGCCGCCTTCATCACAC   |
| CHD3_3     | GAGGAAAAGAAATCCTCAGC   |

|         |                       |
|---------|-----------------------|
| CHD3_4  | GTTTTAGGCTACTTGGGAGG  |
| CHD4_1  | GCTCCGGCTCCTCCTCGCCG  |
| CHD4_2  | GCGCGACCTGCGGGCGGCTCC |
| CHD4_3  | GGCCGTGAGGGGCGTCTCTT  |
| CNOT1_1 | GTCGAGGAGAGCCGGAGTCG  |
| CNOT1_2 | GGAGCCGCCTGAGGTGAGGC  |
| CNOT1_3 | GTTTCTCTACAAAATGGCGC  |
| CNOT2_1 | GAGCCTAGGGGAGTGGAGTC  |
| CNOT2_2 | GCCGCCTTCTCTTCTCCCC   |
| CNOT2_3 | GCAGCTCCAGATCCTAGGCC  |
| CNOT3_1 | GTCAGCTTCCGCGGAGCCAT  |
| CNOT3_2 | GTTGTTCTGACGACGGGGGT  |
| CNOT3_3 | GCCGCTATCGGATAGCGCC   |
| CTR9_1  | GTGAGTGACGGCTCCGGCTC  |
| CTR9_2  | GGAGACTACCGGCTGCGGAG  |
| CTR9_3  | GATGGAGCCCCGCGACATGA  |
| CXXC1_1 | GAATGAATACAACCTTGATCC |
| CXXC1_2 | GAACCTCTCTGCCTGACAAA  |
| CXXC1_3 | GGCAGGCTGTGTGCCTTGCG  |
| DMAP1_1 | GGCCGTTAGGAACATCCAAG  |
| DMAP1_2 | GCGGGCCAAGAGGAGAAGGG  |
| DMAP1_3 | GACCCAGGTGCGGAAGTGCG  |
| DPY30_1 | GAGTGGGACAGTCCACGACT  |
| DPY30_2 | GTGCTCCCGCGCCCAGGTGG  |
| DPY30_3 | GATTTCAACACGAAGACTCC  |
| EED_1   | GAGAAGAGGCGAAACTCAA   |
| EED_2   | GCTGAAACGTCTTTGGAAGG  |
| EED_3   | GTAAGGTCCGTTGGATTAAG  |
| ELP2_1  | GGACTCCCCGCACCCGTTTT  |
| ELP2_2  | GTCATAGAGCACACGGAGC   |
| ELP2_3  | GGTGCCACCATGTCGCCAAC  |
| ELP3_1  | GAAGCGGAAAGGTGCGAAAG  |
| ELP3_2  | GCCTGGGCGTTCGCCCTTT   |
| ELP3_3  | GCAGCCACAACTCAGACCA   |
| ELP4_1  | GCCAGCGTGACCAACGACAG  |
| ELP4_2  | GGTAGTGTTGCCGCGAGTAC  |
| ELP4_3  | GCAACGTCACCAGTTTCCAG  |
| EP400_1 | GCGTCAGGAGGGCGGGAGGA  |
| EP400_2 | GGTAAGTGAGGGCGGAGGCG  |
| EP400_3 | GGCTACGCGACCCCGGACCC  |
| EPC1_1  | GGCACTAACACCAGCCGGGA  |

|          |                       |
|----------|-----------------------|
| EPC1_2   | GCTGCCGGGGACTTGAGGGG  |
| EPC1_3   | GTTGGCTGAAGAGCGCACAG  |
| EZH1_1   | GTGAGTAAACAAGCCTGGGC  |
| EZH1_2   | GGAAATTGGAAGGAATCCGA  |
| EZH1_3   | GGCGCCCCTCCTCATTCCGA  |
| EZH2_1   | GGATTTTCGGGGTGCCTCGTG |
| EZH2_2   | GCTGCCCTCGCCGCTGGTC   |
| EZH2_3   | GGGGATGTACACAATGAAGT  |
| HCFC1_1  | GAAAGGAGCCACAAGCGCCG  |
| HCFC1_2  | GGGCTACGACTGAGGAAGGG  |
| HDAC1_1  | GGGACGGGAGGCGAGCAAGA  |
| HDAC1_2  | GGCTGAGGCTGGAGCGCCGA  |
| HDAC1_3  | GCTCGGAGAGGAGGCTGCGA  |
| HDAC2_1  | GGCTCGGTACCACCCGGCAG  |
| HDAC2_2  | GGCGATAGTCCCGCGGGGAA  |
| HDAC2_3  | GGCACCAACTCGCGAGGAGG  |
| IKBKAP_1 | GTTTGGGCAGATGGGCAAGA  |
| IKBKAP_2 | GCCTGGCACCGTAGAGGTAG  |
| IKBKAP_3 | GGCGAGGCCGGGCCCGCTTC  |
| ING3_1   | GAGGGAACAAGGGGGTCCAG  |
| ING3_2   | GGAAAGTGAGTGCGCGGCGC  |
| ING3_3   | GAGTTTTGTCCCCTCCAATA  |
| INO80_1  | GGGGTCCCAGGAGCCGCGGA  |
| INO80_2  | GGTTCGCTCTCTGAGGCCGT  |
| INO80B_1 | GAAAGGGGACTAGAAATGGT  |
| INO80B_2 | GCGGCGTGGGAGCACCTCTG  |
| INO80B_3 | GCGAATAGATCAAGCAATTT  |
| INO80C_1 | GAAGACTCGGAGTGCGATGG  |
| INO80C_2 | GTTCCGGACTATTCCGGGAG  |
| INO80C_3 | GGAAGTCCAAGGCCCGCGC   |
| INO80D_1 | GGCTGACAGATCAGAGTGAG  |
| INO80D_2 | GGAGCCCGGGGATGTGGGCC  |
| INO80E_1 | GGTAGCGGGAGGGCAGACTC  |
| INO80E_2 | GTCATGAACGGGCCGCGGA   |
| INO80E_3 | GTGCTGCCGCGGGAAGGCTG  |
| JARID2_1 | GACTCGGCGAGCCCTCGCTG  |
| JARID2_2 | GTTACATCTTGAAAAGAAA   |
| JARID2_3 | GGGGGGGAGTGAAGGGCGT   |
| KAT5_1   | GCAAGACTGCCCTGTGACT   |
| KAT5_2   | GCCTCACGAAGCCCCTGTAG  |
| KAT5_3   | GCCACTGGCTGTGCACGTTA  |

|         |                        |
|---------|------------------------|
| KDM1A_1 | GACAGAGCGAGCGGCCCTA    |
| KDM1A_2 | GGCGGCCCGAGATGTTATCT   |
| KDM1A_3 | GCGTGAAGCGAGGCGAGGCA   |
| KDM2B_1 | GCTCGGCTTCCATACCTATA   |
| KDM2B_2 | GCGGACCCGCCATGTGGAGG   |
| KDM2B_3 | GTCGGCCACACAGGTAATGT   |
| KDM6A_1 | GCAGCCACAGGCGGGGACGG   |
| KDM6A_2 | GAAAGCCGCCGCTGCCGACC   |
| KDM6A_3 | GGAGCACTGAGGGGATTCTGT  |
| KMT2A_1 | GAGGCGGCGGCCGCTCCCC    |
| KMT2A_2 | GGCCGGCCCTGAAGAGGCTG   |
| KMT2A_3 | GGCGCTTCCCCGCCCGACCC   |
| KMT2D_1 | GATAAAGATTCCAGAACC GGC |
| KMT2D_2 | GTGCCAGGACCAGAAATGTA   |
| KMT2D_3 | GAGATTATCCAAAACCTGAG   |
| LEO1_1  | GTGAGCGATAATGGCGGATA   |
| LEO1_2  | GCGAAGCTGAGCGTAAAGGT   |
| LEO1_3  | GCGTGGCAGGCCTTCCGCTG   |
| MBD2_1  | GGATTCCAAGGGCTCGGTTA   |
| MBD2_2  | GGGCTGGATGCGCGCGCACC   |
| MBD2_3  | GGACCTAAGAGGCGGTGGCC   |
| MBD3_1  | GGAAGAAGTGCCAGAAAGGT   |
| MBD3_2  | GAGCCCGTTGAGGCCCTGCG   |
| MBD3_3  | GCGCAATGGAGCGGAAGAGG   |
| MED1_1  | GATCAATCTGAAGTCCCCGG   |
| MED1_2  | GGCTCGGGATCCCGGGACGC   |
| MED1_3  | GAAGCTAGATCCGCCACAAA   |
| MED10_1 | GGAGAAGTTTGACCACCTAG   |
| MED10_2 | GTTGAGCCCGGCCTGGCTGC   |
| MED10_3 | GGTCTCCCCAGGGCCTGGCC   |
| MED12_1 | GCGGCCGAGAGACAACAAGG   |
| MED12_2 | GAGGGAGCCGAAAAGGGGGG   |
| MED12_3 | GTAGCGCCGGAGGCACCAGC   |
| MED13_1 | GCCGGCGGCGGCTGCTGTGA   |
| MED13_2 | GGTTACAGTGACAATCTTCC   |
| MED13_3 | GGTGCGCCCTTGGGCCGTGG   |
| MED14_1 | GACTCTGCCCGCTCCCGTTT   |
| MED14_2 | GTGTGCCGTTGCGCCAAGCC   |
| MED14_3 | GTGGTTCTCCAGCTGCACTG   |
| MED15_1 | GATACGGGCGGCGGGAGCTG   |
| MED15_2 | GGTCAGTCAAATGTGAGTAG   |

|         |                      |
|---------|----------------------|
| MED15_3 | GCCGCCTCAGTCACAGAGCC |
| MED17_1 | GGGAGCTTGCGGTGCGTTCT |
| MED17_2 | GCGTTGCGTTCGGTTTCCCG |
| MED17_3 | GAGGCTTCCCTGCGGAGAGC |
| MED23_1 | GGAATATAGGGGCAGAGGGG |
| MED23_2 | GGCGGGGTGATAGTACAGA  |
| MED26_1 | GGCGGCTCCTCCTCCTCCTT |
| MED26_2 | GTCACTCACTCGCCGGCCTC |
| MED26_3 | GGCGTCTCCGCAGCAGATCA |
| MED4_1  | GCGGCTGCTGTCTGCGCTTG |
| MED4_2  | GGCGAGCCTGAGAGCCGGGC |
| MED4_3  | GGAGCGGCTGGGAGGCGGTT |
| MED6_1  | GTTTCGCTAGATCACAGCCT |
| MED6_2  | GATTGTCTGTGGACCAGTTT |
| MED6_3  | GCGTTTACAGGTTCTCTTTC |
| MED7_1  | GAAAGACGAAAGACCGCCTT |
| MED7_2  | GTGCGGTCTCTCCGAGAGCG |
| MED7_3  | GGCTCTAAGCGTGGCAGTCT |
| MED8_1  | GACCGAGAGTGGGCTGGCTA |
| MED8_2  | GGCAGAACCCACGGCTGATA |
| MED8_3  | GCGTTGGGCGTACTAGCGGC |
| MEN1_1  | GTGGGATGTAAGCGCGGAGG |
| MEN1_2  | GACAGACTTTACAGCCCCGG |
| MEN1_3  | GGACTCTCCTTGGGGTTTGG |
| MRGBP_1 | GCTCGGCCGGGCCGCGGCCA |
| MRGBP_2 | GCCGCAGGCGACAAGGGCCC |
| MRGBP_3 | GACAGTGGTGTGGAGCCCCG |
| MTA1_1  | GCCGCCAACATGTACAGGGT |
| MTA2_1  | GTTGGGCTCTGCCGGCCGCA |
| MTA2_2  | GAACGAGCTCGGCTCCTGCC |
| MTA2_3  | GCCTCAGCGTCCCGGGAGTG |
| MTA3_1  | GCCCCAGAACGTGGGGGCCG |
| MTA3_2  | GTCCAGGCGCGCTACACGTT |
| MTA3_3  | GGGGAGGAACGCCTTGTCAC |
| NCOA6_1 | GTCGGGCTGGCTTCGCGGGG |
| NCOA6_2 | GACCGTGCCACTCGGTCGCC |
| NCOA6_3 | GACGGCGGCGCGGGCCCGTA |
| OGT_1   | GCTCTGGAGGGCTTGAGCGG |
| OGT_2   | GCTCCAGATGGCGTCTTCCG |
| OGT_3   | GATGGTCAATTAGAGTTCCC |
| PAF1_1  | GTGAACGCGCAGGCAGCACC |

|          |                       |
|----------|-----------------------|
| PAF1_2   | GCGGAAAGTGGGTTGAGATG  |
| PAF1_3   | GCGGCCTGAGGAGACCCGTT  |
| PBRM1_1  | GGGTAAGGCCGGGCCAGGG   |
| PBRM1_2  | GGCCCGGCAGCTGACCAAGG  |
| PBRM1_3  | GCAGGTGCGACAAGGCTACT  |
| PCGF1_1  | GCCTCATCGCGATCGCAATC  |
| PCGF1_2  | GATGGACCCGCTACGGAACG  |
| PCGF1_3  | GTCGGCCAGCGGTGCGAATT  |
| PCGF2_1  | GCTTACCTGGGTTTCGGGGTC |
| PCGF2_2  | GCCTGTAACCCTCTGGGGAT  |
| PCGF2_3  | GGGGGGTGCGAAGGCAGGAT  |
| PCGF6_1  | GTAGGCGCTGCCAAAACCGA  |
| PCGF6_2  | GGCGCCTCTGTCTGAGACGG  |
| PCGF6_3  | GGTGTCTCTCCCGACCATGG  |
| PHC1_1   | GAAGGTAACCGGGCGACCGA  |
| PHC1_2   | GGGCGTTACACAGATGGAGG  |
| PHC1_3   | GCTCAGCGCCGAGGTAGGC   |
| PHC2_1   | GACTGGCAGCTCATTCTCCA  |
| PHC2_2   | GTACACAGAAATCTGGGGCC  |
| PHC2_3   | GGTAAGAGTCTAATTGATCT  |
| PHC3_1   | GTGACTGATGTGTAAGTAG   |
| PHF10_1  | GGGCCACGCCCGGCACCC    |
| PHF10_2  | GTCGCTGTCGCACGGCCGCG  |
| RBBP4_1  | GGCACCTCACCTTCCTTGT   |
| RBBP4_2  | GCTGAGCCGCGGCTCGACA   |
| RBBP4_3  | GGGGGCGCAGGAAACAATAG  |
| RBBP5_1  | GTTGTTGCCGGAGCTGAGAC  |
| RBBP5_2  | GCTGCGTTTTAGAGAAGCGT  |
| RBBP5_3  | GGTGGACGCCGGAAGAGAC   |
| RBBP7_1  | GGAGCGCAGCCGCTGGAGGA  |
| RBBP7_2  | GCGCGCGCGTTGACCGCCTC  |
| RBBP7_3  | GCCCTTGTCCGGGGTTGCT   |
| RTF1_1   | GGCGGGCAAGAGGGGAGTCC  |
| RTF1_2   | GGACCACCATGGTAAAGAAG  |
| RTF1_3   | GCGCGGGCCGGCGGAGCCAG  |
| RUVBL1_1 | GGGCGCACTGTCCTAGCTGC  |
| RUVBL1_2 | GCCTCCCACAGCCACGTGAA  |
| RUVBL1_3 | GCAGGCGGCCTCAGGGCTTG  |
| SAP18_1  | GGTCAGGGCGAGCGTCTCGC  |
| SAP18_2  | GGAGTCGCGCGTTACCCAGG  |
| SAP18_3  | GATCGACCGCGAGAAGGTGA  |



|           |                       |
|-----------|-----------------------|
| SAP30_1   | GTGAGCGGGGTCCCCGCTCC  |
| SAP30_2   | GGCCCGGGACAGTTGGTGTT  |
| SAP30_3   | GCAGAGTGAATTGCCGCTGC  |
| SETD1A_1  | GAATAGCCCGCTTCTGTCCC  |
| SETD1A_2  | GCCAGCAGGGATTGGCTAAC  |
| SETD1A_3  | GACTCCACCAAGGCGGATGA  |
| SETD1B_1  | GGTTCTCCTCTCGCCCGAA   |
| SETD1B_2  | GATTGACCCGGCTCTGAAAA  |
| SETD1B_3  | GCACGGCTGGGGGGGCGCGC  |
| SIN3A_1   | GGGCTAGTCCGCCGCGCT    |
| SIN3A_2   | GCTCGGTCCCAGGGCCCGCA  |
| SIN3A_3   | GGCCTGTCCCTCGCCTACCT  |
| SIN3A_4   | GCGGCCGCTTCTCTGTTACC  |
| SIN3A_5   | GCCTGTGACCGTTTCGTTAG  |
| SIN3B_1   | GGGACGCCACTCACGTGCAC  |
| SIN3B_2   | GAGGGCCGAGGTGAGAGGTG  |
| SMARCA4_1 | GGGCGGTTTGAATGGAGCCG  |
| SMARCA4_2 | GGCGCGCCCTGTGCGGGGCC  |
| SMARCA4_3 | GGGAAGGCCACAGTGTGCGG  |
| SMARCB1_1 | GGCCTGGTCGTCGTCTGCGG  |
| SMARCB1_2 | GGGCCGAGGGAAACCGAAGC  |
| SMARCB1_3 | GCGAGGGATCAGGAGGGCTG  |
| SMARCC1_1 | GCTGTTTATCGACGGAAGGA  |
| SMARCC1_2 | GACGGTGTCCCAGCTGGATT  |
| SMARCC1_3 | GGTGGGTTTCGCGCGCCCGTG |
| SMARCC2_1 | GACAACGTGCGGCTGTGGCT  |
| SMARCC2_2 | GACCGCGGCCCTGCAGCCCC  |
| SMARCC2_3 | GCCTCGTAGTACTTCACGTT  |
| SMARCD1_1 | GTGGCTCCAAGCGGCGGCGC  |
| SMARCD1_2 | GCCGCACAAAGAACCGGAAC  |
| SMARCD2_1 | GACTCGGGCGGCCAAACCTC  |
| SMARCD2_2 | GCCCGGGAGATTCCGGATCC  |
| SMARCD2_3 | GGAAGTTCGCGAACTTGGATT |
| SMARCD3_1 | GAATGGGAGTCTGCCAGTCA  |
| SMARCD3_2 | GCCAGGCAGCGATGGGGAGG  |
| SMARCD3_3 | GAAAGTGCTCGGCAGGGGGG  |
| SMARCE1_1 | GCGGGTGAGTGTTCCTCAAGT |
| SMARCE1_2 | GAAGTTCGGGTCTAGCCAAG  |
| SMARCE1_3 | GGCCTCAAGGAGGCCTCAAC  |
| SRCAP_1   | GTCAGTCCGTCGGGAGGGCT  |
| SRCAP_2   | GCTCGGGTCTTGGGAACGTG  |

|                  |                       |
|------------------|-----------------------|
| SRCAP_3          | GTGTGAACCCGCAGGAGGCC  |
| SUZ12_1          | GGGCGAGCGTTGGTATTGC   |
| SUZ12_2          | GGCGGGTAGCTGGCGGGGGG  |
| SUZ12_3          | GCCTCAGAAGCACGGCGGTG  |
| THAP1_1          | GTGATGGTGGCCTCCCTCGG  |
| THAP1_2          | GTTCTCAGTGTGCTGCGCT   |
| THAP1_3          | GCTAATGCAAACAACAAAAC  |
| THAP3_1          | GCTGCCCCCAACAAAGATGG  |
| THAP3_2          | GGGTCCCCGCCTCTTACCGG  |
| THAP3_3          | GGGCCCGCGGACCGACTCCG  |
| THOC1_1          | GCTTCGGGCAAACCTGAAGAG |
| THOC1_2          | GGCAAAATTCGAGTAATTC   |
| THOC1_3          | GTCCGCCTCAGCGTCCGCTC  |
| THOC2_1          | GAGGCGAATTGTGAGTGTC   |
| THOC2_2          | GCTGCACTCTCACCTGTAGT  |
| THOC2_3          | GACCATCCACGCCCGCCGCC  |
| THOC3_1          | GCTGCTGCAGTGTGTGAGT   |
| THOC3_2          | GGCGGTCCCCGCTGCAGCCA  |
| THOC3_3          | GCCCCGGCTCGATGGCCCCG  |
| TRRAP_1          | GGGTCGCGGGCCGGGCTGC   |
| TRRAP_2          | GGCGGGCGTCCGAACGGCCC  |
| TRRAP_3          | GCGGCCGAGCGTTGCGACG   |
| WDR5_1           | GGCCGCACAGGAGACAAGGG  |
| WDR5_2           | GCTCTGGCGGCCTCGGTCTC  |
| WDR5_3           | GGCACGCACCTTGCTCTGAG  |
| WDR82_1          | GAGGTGGCTGTGAGGACGAA  |
| WDR82_2          | GGAGGAGGCGGCCCAACTGT  |
| WDR82_3          | GCGGAGCTTCCGCGTCGCTA  |
| NC_1 (DC13_1)    | GGGCTGAACGCGTATTGCGG  |
| NC_2 (DC14_1)    | GGCGATTGCGGACCTTAGT   |
| NC_3 (DC14_2)    | GGCGCGAGTACGAAATTAAT  |
| NC_4 (DC14_3)    | GATTATCAGACGCGCTGCGT  |
| NC_5 (DC15_1)    | GCGCGGCTAGAATAGACTTG  |
| NC_6 (DC15_2)    | GGTTCGTGCGGTAGTGTGCG  |
| NC_7 (DC15_3)    | GTATCGTCTTCCGTCCTCGT  |
| NC_8 (DC15_4)    | GGCTACTCTATGCGTCGATT  |
| NC_9 (DC15_5)    | GCTTAACAAAGCGAGCGACC  |
| NC_10 (DC15_6)   | GGCACTGGACGATATCCGAC  |
| NC_11 (DC15_7)   | GTTTATCTCAACGGTAATCG  |
| NC_12 (DC1617_1) | GGTTATATTGACGTCCTGCC  |
| NC_13 (LC_1)     | GCTAGTCTGCGTGACGCGTCT |

|               |                         |
|---------------|-------------------------|
| NC_14 (LC_2)  | GAAGTAACTGAAGGATCAATAT  |
| NC_15 (LC_3)  | GCGGGAAAACCGCGCCCCGGA   |
| NC_16 (LC_4)  | GCTCAGGGCCGTGAGCGTGGG   |
| NC_17 (LC_5)  | GTAGGAGCGCGTGCTGATTGT   |
| NC_18 (LC_6)  | GGACGAACTAATGTATTGTGGC  |
| NC_19 (LC_7)  | GGTTTATGGACCTTCAGGGAG   |
| NC_20 (LC_8)  | GGCGTACCCGTGGTTTCACCGT  |
| NC_21 (LC_9)  | GCTTGGGAGCAAGCCGGCGGTA  |
| NC_22 (LC_10) | GTGTGGCGACCCTGGTCTCAT   |
| NC_23 (LC_11) | GGGCCTCTGTGAGGTCGTGGT   |
| NC_24 (LC_12) | GTATGATACTCGTGCTTAGT    |
| NC_25 (LC_13) | GCGAAGTCGAATGTTGGTCG    |
| NC_26 (LC_14) | GGCCCAACATCCTCGTGCCA    |
| NC_27 (LC_15) | GTGGCGGAGCCTAGCCGAGAGT  |
| NC_28 (LC_16) | GGCGCGAACTTTAAGGTGGAC   |
| NC_29 (LC_17) | GATTAGTTCGCGTATGGCAGCA  |
| NC_30 (LC_18) | GCCGTAAGGACGGGTAGAGGT   |
| NC_31 (LC_19) | GGGGGCGGAAATCGAGCCCT    |
| NC_32 (LC_20) | GAAGTGAGAGGAGGGAGCAGCC  |
| NC_33 (LC_21) | GTAATCCCGGGAGTCAGA      |
| NC_34 (LC_22) | GTGAGCGGCGACCCCCCTG     |
| NC_35 (LC_23) | GGTGCGGACCCCCGCCGGGGG   |
| NC_36 (LC_24) | GGTGAGCCGGTTTGTGAGAAG   |
| NC_37 (LC_25) | GAGAGTGCGCTGCAATGGATAT  |
| NC_38 (LC_26) | GGATGTGCCATGGTGAGGGCTG  |
| NC_39 (LC_27) | GGATGCGCCTAGGCGAAAGAAA  |
| NC_40 (LC_28) | GAGCCGATGCAGGGCGTAGGG   |
| NC_41 (LC_29) | GCCATTCTCTATGTTTCGATAAG |
| MCM2_PC       | GGATCGTGGTACTGCTATGG    |
| INTS9_PC      | GGCAGGTGGCGGAGATTGCAC   |
| GEMIN5_PC     | GGCGTGAGGCTACGAGCGGT    |
| CENPA_PC      | GCCAAGCACCGGCTCATGTG    |
| POLR1D_PC     | GGAAGCAAGGACCGACCGA     |

**Supplementary Table 2 | Manually curated functional complexes and members**

| Complex                 | Genes within the complex                                                                                     |
|-------------------------|--------------------------------------------------------------------------------------------------------------|
| CNOT                    | <i>CNOT1, CNOT2, CNOT3</i>                                                                                   |
| Elongator               | <i>IKBKAP, ELP2, ELP3, ELP4</i>                                                                              |
| THO                     | <i>THOC1, THOC2, THOC3</i>                                                                                   |
| INO80                   | <i>INO80B, INO80E, INO80, ACTL6A, ACTR8, RUVBL1, INO80C, INO80D</i>                                          |
| SRCAP                   | <i>SRCAP</i>                                                                                                 |
| NuA4                    | <i>ING3, EP400, TRRAP, KAT5, RUVBL1, RUVBL2, EPC1, MRGBP, ACTL6A, DMAP1</i>                                  |
| PAF1C                   | <i>PAF1, CTR9, LEO1, RTF1</i>                                                                                |
| SET1A/B                 | <i>ASH2L, SETD1A, SETD1B, DPY30, RBBP5, WDR82, CXXC1, WDR5</i>                                               |
| MLL1/2                  | <i>DPY30, RBBP5, WDR5, ASH2L, KMT2A, KMT2D, MEN1</i>                                                         |
| MLL2/3                  | <i>DPY30, RBBP5, WDR5, ASH2L, NCOA6, KDM6A</i>                                                               |
| HCFC-OGT                | <i>HCFC1, OGT, THAP1, THAP3</i>                                                                              |
| Mediator                | <i>MED1, MED4, MED6, MED7, MED8, MED10, MED12, MED13, MED14, MED15, MED17, MED23, MED26</i>                  |
| esBAF                   | <i>PBRM1, ARID2, PHF10, SMARCC1, SMARCA4, BRD7, SMARCD1, SMARCD2, ARID1A, ARID1B, SMARCB1, SMARCE1, BRD9</i> |
| cardiac BAF             | <i>SMARCD3</i>                                                                                               |
| neuronal progenitor BAF | <i>SMARCC2</i>                                                                                               |
| NURD                    | <i>MBD2, MBD3, HDAC2, MTA1, MTA3, HDAC1, MTA2, RBBP4, RBBP7, CHD3, CHD4, LSD1</i>                            |
| PRC1                    | <i>PHC1, PHC2, PHC3, CBX2, CBX6, CBX7, CBX8, PCGF1, PCGF2, PCGF6, KDM2B</i>                                  |
| PRC2                    | <i>SUZ12, EED, RBBP4, RBBP7, EZH1, EZH2, JARID2</i>                                                          |
| SIN3                    | <i>SIN3A, SIN3B, RBBP4, RBBP7, HDAC2, HDAC1, SAP30, SAP18</i>                                                |

**Supplementary Table 3 | Comparison with orthogonal dataset (S-score)**

| Gene pairs         | esiRNA <sup>1</sup> | CRISPRi (this study) |
|--------------------|---------------------|----------------------|
| <i>RBBP7+RBBP4</i> | -3.021379           | -3.4432042717        |
| <i>PAF1+MBD2</i>   | -1.924307           | -1.9275465243        |
| <i>MRGBP+MBD2</i>  | -1.154774           | -1.5088420949        |
| <i>TRRAP+RTF1</i>  | 3.387044            | 2.6769924866         |
| <i>SUZ12+HCFC1</i> | 2.01163             | 2.6803257052         |
| <i>RTF1+PAF1</i>   | 8.762486            | 2.7472714405         |
| <i>RTF1+ELP3</i>   | 2.850101            | 2.8665793965         |
| <i>RUVBL1+PAF1</i> | 4.067855            | 3.2018467106         |
| <i>RTF1+CNOT3</i>  | 3.817132            | 3.2039785564         |

**References**

1. Roguev, A. *et al.* Quantitative genetic-interaction mapping in mammalian cells. *Nat. Methods* 10, 432–437 (2013).

**Supplementary Table 4 | Yeast orthologs have similar Rapamycin resistance/sensitization phenotypes to the hits uncovered by CRISPRi screen**

| Gene name     | CRISPRi screen phenotype | Yeast ortholog name | Yeast knockout phenotype   |
|---------------|--------------------------|---------------------|----------------------------|
| <i>CXXC1</i>  | sensitization            | <i>SPP1</i>         | Sensitization <sup>1</sup> |
| <i>SRCAP</i>  | sensitization            | <i>SWR1</i>         | Sensitization <sup>2</sup> |
| <i>RTF1</i>   | resistance               | <i>RTF1</i>         | Resistance <sup>2</sup>    |
| <i>ASH2L</i>  | resistance               | <i>BRE2</i>         | Resistance <sup>3</sup>    |
| <i>IKBKAP</i> | resistance               | <i>IKI3</i>         | Resistance <sup>3</sup>    |
| <i>PBRM1</i>  | resistance               | <i>RSC1</i>         | Resistance <sup>2</sup>    |
| <i>MED12</i>  | resistance               | <i>SRB8</i>         | Resistance <sup>2</sup>    |

**References**

1. Nagy, P. L., Griesenbeck, J., Kornberg, R. D. & Cleary, M. L. A trithorax-group complex purified from *Saccharomyces cerevisiae* is required for methylation of histone H3. *Proc. Natl. Acad. Sci. U. S. A.* **99**, 90–94 (2002).
2. Xie, M. W. *et al.* Insights into TOR function and rapamycin response: chemical genomic profiling by using a high-density cell array method. *Proc. Natl. Acad. Sci. U. S. A.* **102**, 7215–7220 (2005).
3. Kapitzky, L. *et al.* Cross-species chemogenomic profiling reveals evolutionarily conserved drug mode of action. *Mol. Syst. Biol.* **6**, 451 (2010).

**Supplementary Table 5 | Genes confer Rapamycin resistance in the CRISPRi screen are downregulated upon Rapamycin treatment.**

| Gene name    | CRISPRi screen phenotype | Gene expression change upon Rapamycin treatment                                                     |
|--------------|--------------------------|-----------------------------------------------------------------------------------------------------|
| <i>THOC1</i> | resistance               | Decreased <sup>1</sup>                                                                              |
| <i>EP400</i> | resistance               | Decreased ( <a href="https://dx.doi.org/10.7272/Q6TD9V7J">https://dx.doi.org/10.7272/Q6TD9V7J</a> ) |
| <i>THOC3</i> | resistance               | Decreased <sup>2</sup>                                                                              |
| <i>ASH2L</i> | resistance               | Decreased <sup>2</sup>                                                                              |

**References**

1. Rouillard, A. D. *et al.* The harmonizome: a collection of processed datasets gathered to serve and mine knowledge about genes and proteins. *Database* **2016**, (2016).
2. Jimenez, R. H. *et al.* Rapamycin response in tumorigenic and non-tumorigenic hepatic cell lines. *PLoS One* **4**, e7373 (2009).

**Supplementary Table 6 | Primers used for cloning and sequencing**

| Primers used to clone single sgRNA (5'-3'):                           |                                                                                               |
|-----------------------------------------------------------------------|-----------------------------------------------------------------------------------------------|
| Forward primer (N19 is the targeting sequence):                       | GGAGAACCACCTTGTGGN <sub>19</sub> GTTTAAGAGCTATGCTGGAAACAGCA                                   |
| Reverse primer (N10 is the barcode sequence):                         | CTAGTACTCGAGNNNNNNNNNGCGTCGACCCTAGGGCTAGCACTAGTA<br>AAAAAAGCACCGACTCGGTGCCAC                  |
| Primers used to amplify genomic DNA for single sgRNA screens (5'-3'): |                                                                                               |
| Forward primer:                                                       | AATGATACGGCGACCACCGAGATCTACACGGTAATACGGTTATCCACGCGG                                           |
| Reverse primer (NNNNNNN is the index):                                | CAAGCAGAAGACGGCATAACGAGATNNNNNNNNGCACAAAAGGAACTCACCT                                          |
| Custom primers for Mi-seq (5'-3'):                                    |                                                                                               |
| Read1 primer:                                                         | CCACGCGGCCGCCTAATGGATCCTAG                                                                    |
| Read2 primer:                                                         | GTGTGTTTTGAGACTATAAGTATCCCTTGGAGAACCACCTTGTGG                                                 |
| Index read primer:                                                    | GTCTCAAACACACAATTACTTTACAGTTAGGGTGAGTTTCCTTTTGTGC'                                            |
| Primers used to amplify genomic DNA for sgRNA double screens (5'-3'): |                                                                                               |
| Forward primer:                                                       | AATGATACGGCGACCACCGAGATCTACACTGAGACTATAAGTATCCCTTG<br>GAGA                                    |
| Reverse primer (NNNNNNN is the index):                                | CAAGCAGAAGACGGCATAACGAGATNNNNNNCTGGCGAACTACTTACTCT<br>AGCTTCCCGGCAACGCCTTATTTAACTTGCTATGCTGT' |
| Custom primers for Hi-Seq 2500 (5'-3'):                               |                                                                                               |
| Read1 primer:                                                         | CGAAGTTATAAACAGCACAAAAGGAACTCACCTAACTGTAAAGTAATT<br>GTGTG                                     |
| Read2 primer:                                                         | GCACCGACTCGGTGCCACTTTTTCAAGTTGATAACGGAC                                                       |
| Index read primer:                                                    | GTTTAAATAAGGCGTTGCCGGGAAGCTAGAGTAAGTAGTTCCGCCAG                                               |



**Supplementary Table 7 | qPCR primer sequences**

| Gene Name      | Forward primer (5'-3')  | Reverse primer (5'-3')  |
|----------------|-------------------------|-------------------------|
| <i>BRD7</i>    | AAGCACAAGTCGGACAAACAC   | CGTCCCTCCTACTTTGAGGAC   |
| <i>BRD9</i>    | GCAATGACATACAATAGGCCAGA | GAGCTGCCTGTTTGCTCATCA   |
| <i>CBX2</i>    | GCAAGCTGGAGTACCTGGTC    | GGCTCCCAGCTGTTATGTTT    |
| <i>CBX6</i>    | CTCTTCCTCCCGGTGTTTG     | CCGTGGTCAGAAGCAAAG      |
| <i>CBX7</i>    | CGTCATGGCCTACGAGGA      | TGGGTTTCGGACCTCTCTT     |
| <i>DPY30</i>   | GGAGGGACAAACGCAGGTT     | GGTAGGCACGAGTTGGCAA     |
| <i>EPC1</i>    | ATGAGTAACTGTCGTTTCGGG   | GAGGCGTATTCGTGCAGGTC    |
| <i>HDAC2</i>   | CAGATCGTGTAATGACGGTATCA | CCTTTTCCAGCACCAATATCC   |
| <i>INO80E</i>  | TACCGGAATCTGAAGCGGAAG   | TCTAGGAGGAACTCTTGTCCC   |
| <i>KMT2D</i>   | GAGCTACGGCGCTTTGAGTT    | AGGGAACCAATCTGTGATAGGT  |
| <i>LEO1</i>    | CGGATATGGAGGATCTCTCCGG  | CAGAGGCATTACTGCCAGAGG   |
| <i>MBD3</i>    | ACCATGGACCTCCCAAG       | CGACAGCAGCGTCTCATC      |
| <i>MED26</i>   | CGGTGCTGGAAGTCATCTC     | TTCCAAGTCGTGTTTCCTC     |
| <i>MED4</i>    | GGTGGTAACAGCACACGAGA    | TTGCCAGCATTCTATAAGTTCC  |
| <i>MED6</i>    | TGCAGAGGCTAACATTAGAACAC | GCTGTTGCTTCCGAATGATGA   |
| <i>MRGBP</i>   | TGAACCGACACTTCCACATGA   | TGGTCCAGATGACCTTGAT     |
| <i>PBRM1</i>   | AGGAGGAGACTTTCCAATCTTCC | CTTCGCTTTGGTGCCCTAATG   |
| <i>PCGF1</i>   | CGCTACGGAACGAGGAGGA     | CCGGTCCAGTTTGAGGTTGAG   |
| <i>PCGF2</i>   | TTCTCCGCAACAAGATGGAT    | AGTGGCTCGTCCTCGTACA     |
| <i>PHC2</i>    | AGGGAACGGAACTCTGCCT     | TCGATAACATGCGTCAGGATTTG |
| <i>RBBP4</i>   | ATGACCCATGCTCTGGAGTG    | GGACAAGTCGATGAATGCTGAAA |
| <i>RPL19</i>   | TCGCCTCTAGTGTCTCCG      | GCGGGCCAAGGTGTTTTTC     |
| <i>SETD1B</i>  | CTGGCTTAACGACACGCTCT    | CCATCGTCCCGTTTCTTCT     |
| <i>SIN3A</i>   | TTACTGCATGTCCAAGTTCAAGA | CCAGGTGTCGTTTCAAGTACCC  |
| <i>SMARCD1</i> | TGGGAGCTTCGGGTAGAAG     | TGGCATCATATTTGGACAAGG   |
| <i>THAP3</i>   | CAGTGCTGCAACCGCTACA     | CATTGTGCTTTAGTTTCTTGCG  |
| <i>THOC1</i>   | CGGACGCGGTTTACGAAGT     | AAAAGGTGTAGATGCGGTACAAA |
| <i>WDR5</i>    | GAGGAGAAGAAGCCCAGAC     | GCATAGTTTGGCTTACAGGT    |

**Supplementary Table 8 | Primers used to generate esiRNA**

| Gene Symbol                         | Gene ID (Entrez) | Forward Primer (5'-3')           | Reverse Primer (5'-3')            |
|-------------------------------------|------------------|----------------------------------|-----------------------------------|
| <i>ACTR8</i>                        | 93973            | GGGCGGGTACTGCTG<br>ACCGAAAGTCTGC | GGGCGGGTCCTCCTTT<br>CCATGCAATCAG  |
| <i>BRD7</i>                         | 29117            | GGGCGGGTCCAAGTG<br>ATTTCAGCATCCA | GGGCGGGTGGGACCCA<br>AGAGACAGATCA  |
| <i>CNOT3</i>                        | 4849             | GGGCGGGTCCCCTCT<br>GACTCTGAGCGTA | GGGCGGGTGCGGTACT<br>CAAAGGTGAAGC  |
| <i>DPY30</i>                        | 84661            | GGGCGGGTCAGATGC<br>TGGAGGGACAAAC | GGGCGGGTTCTGTTGT<br>CCGGAAGGTTCT  |
| <i>EPC1</i>                         | 80314            | GGGCGGGTGGTGTATT<br>GGATTTGCACGA | GGGCGGGTAGTGCCAG<br>TTGCTGTTGATG  |
| <i>EP400</i>                        | 57634            | GGGCGGGTTTAACTCA<br>GCGAACCATCCA | GGGCGGGTTGGTGTA<br>GCTGCTCCATGA   |
| <i>HDAC1</i>                        | 3065             | GGGCGGGTCGAATCC<br>GCATGACTCATAA | GGGCGGGTTGTACAGC<br>ACCCTCTGGTGA  |
| <i>INO80D</i>                       | 54891            | GGGCGGGTCTGAAGA<br>GAGCGGAGAGGAA | GGGCGGGTTTGTTAGC<br>GCACTGTTCCACC |
| <i>KAT5</i>                         | 10524            | GGGCGGGTGTCACCC<br>GGATGAAGAACAT | GGGCGGGTGTTAGGAT<br>GCAGGCCACATT  |
| <i>KDM1A</i>                        | 23028            | GGGCGGGTGCCCAA<br>GAACTGTGGTGT   | GGGCGGGTCCCAAAA<br>CTGGTCTGCAAT   |
| <i>LEO1</i>                         | 123169           | GGGCGGGTTGACACT<br>GAGGTGCCAAAAG | GGGCGGGTTGCTTCCA<br>TCTGACCACTTG  |
| <i>MED4</i>                         | 29079            | GGGCGGGTGCTGTTTA<br>CCAAGCGAAGGA | GGGCGGGTACTGCTTG<br>AGGAGTCCGTTG  |
| <i>MED14</i>                        | 9282             | GGGCGGGTATGTTCCA<br>TGCGTCTTCTC  | GGGCGGGTGAATCAGA<br>AGCTGGCAAAGG  |
| <i>MED15</i>                        | 51586            | GGGCGGGTATTCTGAC<br>AGACCCCTCGAA | GGGCGGGTATCCAGCT<br>TGCAGATCAGGT  |
| <i>MED17</i>                        | 9440             | GGGCGGGTCTTAGCAA<br>GCCGAATTGAGG | GGGCGGGTCTGCCACT<br>TTCAGGTCCATT  |
| <i>PHC1</i>                         | 1911             | GGGCGGGTCATCTCCT<br>GGGCCTTTATCA | GGGCGGGTTCTTCCCT<br>GCAAAGTCTGCT  |
| <i>eGFP (Non-Targeting Control)</i> |                  | GGGCGGGTCCACATG<br>AAGCAGCACGA   | GGGCGGGTCGTCTCG<br>ATGTTGTGGC     |

## **REAGENTS AND EQUIPMENT**

### **DNA constructs**

1. pNMd0 (sgRNA expression backbone vector)
2. pSLQ1643 (TetON-dCas9-KRAB-P2A-mCherry)

### **Reagents**

1. PCR primers for sgRNA cloning (Integrated DNA Technologies (IDT), custom DNA oligonucleotides)
2. Phusion (New England Biolabs, cat. no. M0536L)
3. LongAmp Hot Start Taq DNA Polymerase (New England Biolabs, cat. no. M0534L)
4. XhoI, XbaI, SpeI-HF, Sall-HF, BstXI (New England Biolabs, cat. no. R0146L, R0145L, R3133L, R3138L, R0113L)
5. Alkaline Phosphatase, Calf Intestinal (CIP) (New England Biolabs, cat. no. M0290L)
6. T4 DNA ligase (New England Biolabs, cat. no. M0202L)
7. QIAquick gel extraction kit (Qiagen, cat. no. 28706)
8. QIAquick PCR purification kit (Qiagen, cat. no. 28106)
9. QIAprep spin miniprep kit (Qiagen, cat. no. 27106)
10. HiSpeed Plasmid Maxi Kit (Qiagen, cat. no. 12662)
11. UltraPure 10× TAE buffer (Invitrogen, cat. no. 15558-026)
12. UltraPure agarose (Invitrogen, cat. no. 16500500)
13. Ethidium bromide solution, 10 mg ml<sup>-1</sup> (Sigma-Aldrich, cat. no. E8751)
14. All-purpose HI-LO DNA mass ladder (Bionexus, cat. no. BN2050)
15. LB medium (Sigma-Aldrich, cat. no. L3022)
16. LB agar medium (Sigma-Aldrich, cat. no. L2897)
17. Carbenicillin, sterile filtered, 100 mg ml<sup>-1</sup> (Sigma-Aldrich, cat. no. C1613)
18. α-Select Electrocompetent Cells (BIOLINE USA Inc, cat. no. BIO-85028)
19. Mirus TransIT-LT1 transfection reagent (Mirus, cat. no. 2300)
20. DMEM-high glucose medium (Invitrogen, cat. no. 11960-044)
21. Penicillin-streptomycin (Invitrogen, cat. no. 15070-063)
22. Trypsin-EDTA solution, 0.05% (wt/vol) (Invitrogen, cat. no. 25300-062)
23. Puromycin (Sigma-Aldrich, cat. no. P9620-10ML)
24. Doxycycline (Sigma-Aldrich, cat. no. D3447-500MG)
25. ddH<sub>2</sub>O, sterile

### **Equipment**

1. Microcentrifuge tubes, 1.7 ml (Axygen Scientific, cat. no. MCT-175-C-S)
2. Microcentrifuge (Thermo Scientific, cat. no. 75002431)
3. Manual Pipettes (P2, P20, P200, P1000) & tips
4. Multichannel pipettes (Rainin, cat. nos. L12-10 XLS+, L12-200 XLS+ and L12-1200 XLS)
5. Thermocycler with programmable temperature control, 96 wells (Bio-Rad, T100)
6. CFX96 Touch™ Real-Time PCR Detection System (Bio-Rad)
7. Strip PCR tubes, 8 wells (Applied Biosystems, cat. no. N801-0580)

8. Gel electrophoresis system (PowerPac basic power supply, Bio-Rad, cat. no. 164-5050 and Sub-Cell GT system gel tray, Bio-Rad, cat. no. 170-4401)
9. 6 well plates (Greiner Bio One International GmbH, cat. no. 657160)
10. Incubator for bacteria plates (Thermo Scientific, cat. no. 50125590)
11. NanoDrop 8000 UV-visible spectrophotometer (Thermo Scientific)
12. Digital gel imaging system (GE)
13. Dark reader (Clare Chemical Research, Inc. DR22A)
14. BD FACSAria II sorter (BD Biosciences)
15. Tissue Culture Hood/Biosafety Cabinet
16. CO<sub>2</sub> incubator at 37°C and 5% CO<sub>2</sub> for mammalian cell culture
17. Cell counting system
18. Electroporator (Bio-Rad)
19. Bioanalyzer (Agilent)
20. Miseq and HiSeq2500 (Illumina)

## **PROCEDURE**

### **Preparation of single and double sgRNA library**

#### **Library design**

We designed a library of 358 sgRNAs targeting a set of 107 genes encoding epigenetic regulators (1~3 sgRNAs/gene) using top prediction hits from the CRISPR-ERA algorithm<sup>7</sup>. The library also included 41 non-targeting negative control sgRNAs (NC\_1 to NC\_41) and 5 positive controls targeting genes (*MCM2*, *GEMIN5*, *CENPA*, *INTS9* and *POLR1D*) strongly affecting cell proliferation. We excluded any sgRNAs containing XbaI, XhoI, SpeI, and Sall restriction sites, which were used for double sgRNA library construction.

#### **Cloning Step 1: Construct single gRNA vector**

The sgRNA expressing constructs have been previously described<sup>8,9</sup>. The SpeI and Sall sites were removed in the sgRNA expression construct pNMd0. The single sgRNA expression constructs were cloned as described previously with minor modifications (cloning strategy is shown in **Supplementary Fig. 1a**).

1. Assemble the following reaction (volumes shown are per reaction) in a 0.2 mL PCR tube using the following primers:

Forward primer (sgRNA-F, N<sub>19</sub> is the targeting sequence):

5'- GGAGAACCACCTTGTGGN<sub>19</sub>GTTTAAGAGCTATGCTGGAAACAGCA -3'

Reverse primer (sgRNA-R, N<sub>10</sub> is the barcode sequence):

5'-CTAGTACTCGAGN<sub>10</sub>GCGTCGACCCTAGGGCTAGCACTAGTAAAAAAGCACCGACTCGG  
TGCCAC -3'

#### **Assemble the following reaction:**

|        |                                           |
|--------|-------------------------------------------|
| 0.5 µL | template (addgene #51024, 100 ng/µL)      |
| 2.5 µL | Forward primer (sgRNA-F) (10 µM)          |
| 2.5 µL | Reverse primer (sgRNA-R) (10 µM)          |
| 2 µL   | dNTPs (10 mM)                             |
| 0.5 µL | Phusion high-fidelity polymerase (2 U/µL) |
| 42 µL  | Nuclease-free water                       |
| 50 µL  | TOTAL VOLUME                              |

#### **Cycling conditions**

|           |      |         |
|-----------|------|---------|
| 1 cycle   | 98°C | 30 sec  |
| 25 cycles | 98°C | 10 sec  |
|           | 62°C | 30 sec  |
|           | 72°C | 10 sec  |
| 1 cycle   | 72°C | 5 min   |
| 1 cycle   | 4°C  | Forever |

2. Check reaction products by running 5 µL of the reaction on a 1% agarose gel. Successful PCR reactions should show a ~185 bp DNA product.
3. Add 1µL DpnI (20 U/µL) into each PCR reaction, incubate at 37°C for 1 h.

4. Purify PCR products using QIAquick PCR purification kit by following the manufacturer's instructions.
5. To digest pNMd0 sgRNA backbone assemble the following reaction:

|            |                                           |
|------------|-------------------------------------------|
| 2 $\mu$ L  | pNMd0 sgRNA backbone (1 $\mu$ g/ $\mu$ L) |
| 2 $\mu$ L  | BstXI (10 U/ $\mu$ L)                     |
| 1 $\mu$ L  | XhoI (20 U/ $\mu$ L)                      |
| 5 $\mu$ L  | 10x Buffer 3                              |
| 40 $\mu$ L | Nuclease-free water                       |
| 50 $\mu$ L | TOTAL VOLUME                              |

Incubate at 37°C for 1 hour.

6. Gel-purify ~9.7 kbp products by 0.8% agarose gel electrophoresis and QIAquick gel extraction kit following the manufacturer's instructions.
7. Measure the concentrations of the sgRNA backbone vector and sgRNA PCR fragments using a NanoDrop 8000 spectrophotometer.
8. To clone the new sgRNA fragments into the sgRNA expression vector, assemble the following In-Fusion cloning reaction::

|           |                                  |
|-----------|----------------------------------|
| 1 $\mu$ L | 5X In-Fusion HD enzyme premix    |
| 50 ng     | Linearized sgRNA backbone vector |
| 25 ng     | Purified new sgRNA PCR fragments |
| x $\mu$ L | ddH <sub>2</sub> O               |
| 5 $\mu$ L | TOTAL VOLUME                     |

Incubate for 15 min at 50°C followed by 5 min incubation on ice.

9. Transform the In-Fusion reactions into chemically competent E. coli cells according to the manufacturer's instructions. Plate onto a LB agar plate supplemented with 100  $\mu$ g/mL carbenicillin and incubate at 37°C overnight.
10. Confirms successful cloning by Sanger sequencing 2-3 bacterial colonies. Construct the single sgRNA library by mixing equal amounts of each of the single sgRNA constructs. This pool is then split in two and used as storage and target vector pools.

### Cloning Step 2: Construct double gRNA library

In order to enable the insertion of the mU6-sgRNA expression cassettes and construct higher order (double) sgRNA constructs we utilize unique SpeI and Sall sites introduced in the sgRNA expressing vector. Constructs for mU6-driven expression of pairs of sgRNAs were generated by digesting the storage vectors with XbaI and XhoI enzymes and ligating the mU6-sgRNA cassettes into the target vectors backbone digested with SpeI and Sall (**Supplementary Fig. 1b**).

1. Prepare single sgRNA library in target vector pool and storage vector pool.
2. Digest target vector pool with SpeI-HF and Sall-HF:

Assemble the following reaction:

|           |                                         |
|-----------|-----------------------------------------|
| 2 $\mu$ L | target vector pool (1 $\mu$ g/ $\mu$ L) |
| 1 $\mu$ L | SpeI-HF (20 U/ $\mu$ L)                 |

|            |                         |
|------------|-------------------------|
| 1 $\mu$ L  | Sall-HF (20 U/ $\mu$ L) |
| 5 $\mu$ L  | 10x CutSmart Buffer     |
| 41 $\mu$ L | Nuclease-free water     |
| 50 $\mu$ L | TOTAL VOLUME            |

Incubate at 37°C for 1 hour.

3. Gel-purify ~10 kbp DNA products using 1% agarose gel electrophoresis and QIAquick gel extraction kit by following the manufacturer's instructions.
4. Digest storage vector pool with XbaI and XhoI:

|            |                                          |
|------------|------------------------------------------|
| 2 $\mu$ L  | storage vector pool (1 $\mu$ g/ $\mu$ L) |
| 1 $\mu$ L  | XbaI (20 U/ $\mu$ L)                     |
| 1 $\mu$ L  | XhoI (20 U/ $\mu$ L)                     |
| 5 $\mu$ L  | 10x CutSmart Buffer                      |
| 41 $\mu$ L | Nuclease-free water                      |
| 50 $\mu$ L | TOTAL VOLUME                             |

Incubate at 37°C for 1 hour.

5. Gel-purify ~480 bp DNA products using 1% agarose gel electrophoresis and QIAquick gel extraction kit by following the manufacturer's instructions.
6. Ligate the pooled inserts and pooled backbones:

Assemble the following reaction:

|            |                          |
|------------|--------------------------|
| 2 $\mu$ L  | 10X T4 DNA Ligase Buffer |
| 100ng      | pooled inserts           |
| 300ng      | pooled backbones         |
| 1 $\mu$ L  | T4 DNA Ligase            |
| X $\mu$ L  | Nuclease-free water      |
| 20 $\mu$ L | TOTAL VOLUME             |

Incubate at 16°C for 12-16 hours followed by heat inactivation at 65°C for 10 minutes.

7. Transform 2  $\mu$ L of the ligation reaction into 100  $\mu$ L of  $\alpha$ -Select Electrocompetent Cells according to the manufacturer's protocol using a Bio-Rad Electroporator. Spread a small fraction (100 $\mu$ L) of cultures on carbenicillin (100  $\mu$ g/ml) LB plates and grow overnight at 30°C. Calculate the ligation and transformation efficiency, and scale up the ligation and transformation to reach at least 50x double library coverage.
8. Extract plasmid DNA using HiSpeed Plasmid Maxi Kit (Qiagen). Library diversity is determined by deep sequencing.

### **Lentivirus production**

*Note: it is important to use mycoplasma-free HEK 293T cells for the production of lentiviral particles. This protocol is for 6 well plates. The experiment can be scaled up.*

1. Seed a six-well tissue-culture plate with 2~3 x 10<sup>5</sup> HEK 293T cells in 2 mL DMEM high-glucose medium containing 10% FBS per well 24 h before transfection. Incubate at

- 37°C and 5% CO<sub>2</sub> in a CO<sub>2</sub> incubator, overnight.
- 24 h after plating the cells, prepare a 3 µg DNA mixture by adding 1.32 µg dR8.91, 165 ng MD2.G lentiviral packaging plasmids and 1.51 µg dCas9 or sgRNA expression vector. Add the mixture to 250 µL Opti-MEM reduced-serum medium in a microcentrifuge tube. Mix well by pipetting up and down.
  - Add 7.5 µL Mirus TransIT-LT1 transfection reagent into the 250 µL Opti-MEM reduced-serum medium. Mix well by pipetting up and down. Allow transfection complexes to form for 30 min at room temperature.
  - Add 250 µL of Opti-MEM with DNA and transfection reagent mixture to the well in the six-well plate. Mix the well by rocking the plate gently back and forth. Incubate at 37°C and 5% CO<sub>2</sub> in a CO<sub>2</sub> incubator for 24 h.
  - Replace the transfection medium with 2.5 mL fresh DMEM medium with 10% FBS to collect lentiviruses. Harvest the viral supernatant at 24~48 h after medium replacement using a sterile syringe. Filter the medium through a 0.45 µm syringe filter into a conical tube to avoid transferring HEK 293T cells to target cells.

### **Generation of TetON-dCas9-KRAB HEK 293 cells**

- Package TetON-dCas9-KRAB-P2A-mCherry expressing lentiviral vector (pSLQ1643) and rTA expressing vector into viral particles as described in '**Lentivirus production**'
- Plate 1.5~2 x 10<sup>5</sup> HEK 293 cells per well in a six-well plate with 2 mL DMEM medium supplemented with 10% FBS per well 16 h before transduction.
- Replace the medium with 1 mL DMEM with 10% FBS and 1 mL filtered viral supernatant (TetON-dCas9-KRAB-P2A-mCherry : rTA is 1:1), and incubate overnight at 37°C and 5% CO<sub>2</sub> in a CO<sub>2</sub> incubator.
- Replace the viral supernatant with 2 mL fresh DMEM with 10% FBS and incubate at 37°C and 5% CO<sub>2</sub> in a CO<sub>2</sub> incubator.
- 24 hours after lentivirus transduction, add 1 µg/µL Dox to induce dCas9-KRAB-P2A-mCherry expression. 24h later, sort the red fluorescent protein (mCherry) positive cells into 96 well plates by using a BD FACSAria II sorter, and incubate the clonal cells collected at 37°C and 5% CO<sub>2</sub> in a CO<sub>2</sub> incubator.
- Clones displaying high mCherry expression upon Dox induction and undetectable mCherry expression in the absence of Dox were selected for further characterization.

### **Competitive growth experiments**

*Note: It is important to maintain high cell coverage (> 1000X) at all stages of the competitive growth experiment. Also, at least 2 biological replicates are needed for each growth assay.*

- Package the pooled library of single and double gRNA constructs into lentivirus (see '**Lentivirus production**')
- Titer the library virus in the TetON-dCas9-KRAB HEK 293 cells by serial dilution.
- The target TetON-dCas9-KRAB HEK 293 cells were transduced with the packaged libraries in the presence of 8 µg/ml polybrene (Sigma) at a multiplicity of infection (MOI) of about 0.3 (corresponding to an infection efficiency of 30-40%) to ensure single copy integration in most infected cells.
- 48h after infection, add 1 µg/mL Puromycin for 3 days.
- After Puromycin selection, the cells were split into 2 pools treated with Dox or without



Dox. Cells were maintained for minimum desired coverage (1000X library size) and harvested at 0, 9 or 16 days for single sgRNA library screening, or at 0, 8 or 16 days for double sgRNA screening.

6. Extract DNA from cells harvested at 0, 9, 16day (for single screen) or 0, 8, 16day (for double screen) time points using the Blood and Cell Culture DNA Mini (for single screen) or Maxi (for double screen) Kit (Qiagen) according to manufacturer instructions.

### **NGS library preparation**

1. Digest the genomic DNA (gDNA) with MfeI-HF restriction enzyme. Adjust volumes of gDNA using ddH<sub>2</sub>O, and set up reactions using NEB CutSmart buffer as below. The reaction volume can be scaled up or down.

Assemble the following reaction:

|             |                         |
|-------------|-------------------------|
| 1.2 mL      | gDNA sample             |
| 134 $\mu$ L | 10X CutSmart Buffer     |
| 5 $\mu$ L   | MfeI-HF (20 U/ $\mu$ L) |
| 1.34 mL     | TOTAL VOLUME            |

Incubate at 37°C overnight.

2. Run all the samples in 0.8% agarose gel, stain the gel with EtBr, and excise region of interest around ~1000-3000 bp (CRISPR sgRNA fragment size ~ 1650 bp) using blue light to visualize the DNA.
3. Gel-purify by using QIAGEN Gel extraction kit. Concentrate the purified gDNA fragment to 30  $\mu$ L (for single screen sample) or 1.5 mL (for double screen sample).
4. Setup 100  $\mu$ L PCR reactions (in multiples) using purified gDNA template (**Supplementary Fig. 1c**):

*Note: split reactions into 50 wells of 8-tube PCR strips (100  $\mu$ L / well) for double screen gDNA.*

| Name                                                                 | Sequence (5'-3')                                                                                          |
|----------------------------------------------------------------------|-----------------------------------------------------------------------------------------------------------|
| <i>Single forward primer (single-F):</i>                             | AATGATACGGCGACCACCGAGATCTACACGGTAATACGGT<br>TATCCACGCGG                                                   |
| <i>Single reverse primer (single-R, N<sub>8</sub> is the index):</i> | CAAGCAGAAGACGGCATAACGAGATN <sub>8</sub> GCACAAAAGGAAAC<br>TCACCCT                                         |
| <i>Double forward primer (double-F):</i>                             | AATGATACGGCGACCACCGAGATCTACACTGAGACTATAA<br>GTATCCCTTGGAGA                                                |
| <i>Double reverse primer (double-R, N<sub>6</sub> is the index):</i> | CAAGCAGAAGACGGCATAACGAGAT<br>N <sub>6</sub> CTGGCGAACTACTTACTCTAGCTTCCCGGCAACGCCTT<br>ATTAAACTTGCTATGCTGT |

Assemble the following reaction:

|             |                                       |
|-------------|---------------------------------------|
| 30 $\mu$ L  | Template gDNA                         |
| 20 $\mu$ L  | 5X LongAmp <i>Taq</i> Reaction Buffer |
| 3 $\mu$ L   | 10 mM dNTPs                           |
| 4 $\mu$ L   | Forward primer (10 $\mu$ M)           |
| 4 $\mu$ L   | Reverse primer (10 $\mu$ M)           |
| 4 $\mu$ L   | LongAMP <i>Taq</i> (2.5 U/ $\mu$ L)   |
| 35 $\mu$ L  | Milli-Q Water                         |
| 100 $\mu$ L | total volume                          |

Cycling conditions

|           |      |         |
|-----------|------|---------|
| 1 cycle   | 94°C | 30 sec  |
| 19 cycles | 94°C | 25 sec  |
|           | 60°C | 25 sec  |
|           | 65°C | 1 min   |
| 1 cycle   | 65°C | 10 min  |
| 1 cycle   | 4°C  | Forever |

5. Purify pooled PCR reactions using QIAquick PCR purification kit according to manufacturer protocols.
6. Run the purified sample in 1.5% agarose gel, stain the gel with EtBr, and excise the band of interest around ~ 350 bp (for single screen) or ~ 650 bp (for double screen).
7. Gel-purify using QIAGEN Gel extraction kit according to manufacturer protocols and measure the DNA concentrations using the Nanodrop.
8. Determine DNA purity and ~350 bp fragment (for single screen) and ~ 650 bp (for double screen) concentrations using Bioanalyzer.
9. Pool samples for sequencing, according to Bioanalyzer results.

### **Next-generation sequencing (NGS)**

To identify both gRNA on each construct 75 bp paired-end reads are required. The sequencing primers and strategy are shown in **Supplementary Fig. 1c**. Given the lack of base diversity in the amplicon it is necessary to spike in ~20% PhiX when sequencing using Illumina HiSeq Rapid run. Sequencing primers are as follows:

| <b>Name</b>              | <b>Sequence (5'-3')</b>                                    |
|--------------------------|------------------------------------------------------------|
| Single read1 primer      | CCACGCGGCCGCCTAATGGATCCTAG                                 |
| Single read2 primer      | GTGTGTTTTGAGACTATAAGTATCCCTTGGAGAACCACCTTGTTGG             |
| Single index read primer | GTCTCAAACACACAATTACTTTACAGTTAGGGTGAGTTTCCTTTTGT<br>GC      |
| Double read1 primer      | CGAAGTTATAAACAGCACAAAAGGAAACTCACCTAACTGTAAAGTA<br>ATTGTGTG |
| Double read2 primer      | GCACCGACTCGGTGCCACTTTTTCAAGTTGATAACGGAC                    |
| Double index read primer | GTTTAAATAAGGCGTTGCCGGGAAGCTAGAGTAAGTAGTTCGCCAG             |

### **Data processing and calculation of genetic interaction scores**

Raw counts were extracted from FASTQ files using a software pipeline (code available upon request). Briefly, reads containing sgRNA sequences are identified, paired reads are matched, sgRNA sequences are extracted and matched to their respective targets.

Raw counts were processed and scored using the S-score<sup>10</sup> framework. Detailed explanation of all the steps can be found in the **Supplementary Materials and Methods** section accompanying the manuscript.

## **References**

1. Qi, L. S. *et al.* Repurposing CRISPR as an RNA-guided platform for sequence-specific control of gene expression. *Cell* **152**, 1173–1183 (2013).
2. Gilbert, L. A. *et al.* CRISPR-mediated modular RNA-guided regulation of transcription in eukaryotes. *Cell* **154**, 442–451 (2013).
3. Hilton, I. B. *et al.* Epigenome editing by a CRISPR-Cas9-based acetyltransferase activates genes from promoters and enhancers. *Nat. Biotechnol.* **33**, 510–517 (2015).
4. Mali, P. *et al.* CAS9 transcriptional activators for target specificity screening and paired nickases for cooperative genome engineering. *Nat. Biotechnol.* **31**, 833–838 (2013).
5. Gilbert, L. A. *et al.* Genome-Scale CRISPR-Mediated Control of Gene Repression and Activation. *Cell* **159**, 647–661 (2014).
6. Konermann, S. *et al.* Genome-scale transcriptional activation by an engineered CRISPR-Cas9 complex. *Nature* **517**, 583–588 (2015).
7. Liu, H. *et al.* CRISPR-ERA: a comprehensive design tool for CRISPR-mediated gene editing, repression and activation. *Bioinformatics* **31**, 3676–3678 (2015).
8. Du, D. & Qi, L. S. CRISPR Technology for Genome Activation and Repression in Mammalian Cells. *Cold Spring Harb. Protoc.* **2016**, db.prot090175 (2016).
9. Du, D. & Qi, L. S. An Introduction to CRISPR Technology for Genome Activation and Repression in Mammalian Cells. *Cold Spring Harb. Protoc.* **2016**, db.top086835 (2016).
10. Collins, S. R., Schuldiner, M., Krogan, N. J. & Weissman, J. S. A strategy for extracting and analyzing large-scale quantitative epistatic interaction data. *Genome Biol.* **7**, R63 (2006).

| Figure                 | panel | data                                                                                                                |
|------------------------|-------|---------------------------------------------------------------------------------------------------------------------|
| Figure 1               |       |                                                                                                                     |
|                        | b     | Supplementary_Dataset_3:day16_r2-3                                                                                  |
|                        | c     | Supplementary_Dataset_3:day16_r2-3                                                                                  |
|                        | d     | Supplementary_Dataset_3:Figure 1d.xlsx                                                                              |
|                        | e     | Supplementary_Dataset_3:day16_r1-8                                                                                  |
|                        | f     | Supplementary_Dataset_3:Figure 1f.xlsx                                                                              |
|                        | g     | Supplementary_Dataset_3:day16_r2-3<br>Supplementary_Dataset_3:day0_r1<br>Supplementary_Dataset_3:day8_r1-2          |
| Figure 2               |       |                                                                                                                     |
|                        | a     | Supplementary_Dataset_3:day16_r1-7<br>Supplementary_Dataset_1                                                       |
|                        | b     | Supplementary_Dataset_3:Figure 2b.xlsx                                                                              |
|                        | c     | Supplementary_Dataset_3:Figure 2c.xlsx                                                                              |
| Supplementary Figure 2 |       |                                                                                                                     |
|                        | a     | Supplementary_Dataset_3:Figure S2a qPCR raw data.xlsx<br>Supplementary_Dataset_3:Figure S2a 19 growth bargraph.xlsx |
|                        | b     | Supplementary_Dataset_3:Figure S2b.xlsx                                                                             |
|                        | c     | Supplementary_Dataset_3:Figure S2c.xlsx                                                                             |
|                        | d     | Supplementary_Dataset_3:Figure S2d.xlsx                                                                             |
| Supplementary Figure 3 |       |                                                                                                                     |
|                        | b     | Supplementary_Dataset_3:Figure S3b.xlsx                                                                             |
| Supplementary Figure 4 |       |                                                                                                                     |
|                        | a     | Supplementary_Dataset_3:day0_r1-2                                                                                   |

|                               |         |                                                                                                        |
|-------------------------------|---------|--------------------------------------------------------------------------------------------------------|
|                               |         | Supplementary_Dataset_3:double_lib_before_pack                                                         |
|                               | b       | Supplementary_Dataset_3:Figure S4b.xlsx                                                                |
|                               | c-d-e-f | Supplementary_Dataset_3:Figure S4c-f.xlsx                                                              |
|                               | g       | Supplementary_Dataset_3:day0_r1-2                                                                      |
|                               | h       | Supplementary_Dataset_3:day8_r1-2                                                                      |
|                               | i       | Supplementary_Dataset_3:day8_r1-2                                                                      |
|                               | j       | Supplementary_Dataset_3:Figure S4j.xlsx                                                                |
|                               | k       | Supplementary_Dataset_3:day8_r1<br>Supplementary_Dataset_3:day0_r1<br>Supplementary_Dataset_3:day16_r1 |
|                               | l-m     | Supplementary_Dataset_3:Figure S4l-m.xlsx                                                              |
|                               | n       | Supplementary_Dataset_3:day0_r1-2<br>Supplementary_Dataset_3:day8_r1-2                                 |
|                               | o       | Supplementary_Dataset_3:day0_r1-2<br>Supplementary_Dataset_3:day16_r1-8                                |
|                               | p       | Supplementary_Dataset_3:Figure S4p.xlsx                                                                |
|                               | q       | Supplementary_Dataset_3:day16_r2<br>Supplementary_Dataset_3:day16_r3                                   |
| <b>Supplementary Figure 5</b> |         |                                                                                                        |
|                               | a       | Supplementary_Dataset_3:Figure S5a.xlsx                                                                |
|                               | b       | Supplementary_Dataset_3:day8_r1-2                                                                      |
|                               | c       | Supplementary_Dataset_3:Figure S5c.xlsx                                                                |
|                               | d       | Supplementary_Dataset_3:day8_r2                                                                        |

|                               |     |                                                                                                                                                   |
|-------------------------------|-----|---------------------------------------------------------------------------------------------------------------------------------------------------|
|                               |     | Supplementary_Dataset_3:day16_r3                                                                                                                  |
|                               | e   | Supplementary_Dataset_3:Figure S5e.xlsx                                                                                                           |
|                               | f   | Supplementary_Dataset_3:day0_r1<br>Supplementary_Dataset_3:day8_r2<br>Supplementary_Dataset_3:day16_r3<br>Supplementary_Dataset_3:Figure S5f.xlsx |
| <b>Supplementary Figure 6</b> |     |                                                                                                                                                   |
|                               | a   | Supplementary_Dataset_3:Figure S6a.xlsx                                                                                                           |
|                               | b   | Supplementary_Dataset_3:day16_r1                                                                                                                  |
|                               | c-d | Supplementary_Dataset_3:Figure S6c-d growth validation curve.xlsx<br>Supplementary_Dataset_3:Figure S6c-d qPCR for growth validation pairs.xlsx   |
| <b>Supplementary Figure 7</b> |     |                                                                                                                                                   |
|                               | a   | Supplementary_Dataset_3:day16_r1-7                                                                                                                |
|                               | b   | Supplementary_Dataset_2:Day0 day9 day16 replicates:day0                                                                                           |
|                               | c   | double_lib_before_pack                                                                                                                            |
|                               | d   | Supplementary_Dataset_3:day16_r1<br>Supplementary_Dataset_3:day16_r8                                                                              |
|                               | e   | Supplementary_Dataset_3:day16_r3                                                                                                                  |
| <b>Supplementary Figure 8</b> |     |                                                                                                                                                   |
|                               | a   | Supplementary_Dataset_3:Figure S8.xlsx                                                                                                            |
